# Supplementary material
Source: PubMed Central journal article supplement (PMC10308508)
Supplement: web_material_kwac187.pdf [file web_material_kwac187.pdf]

## WEB MATERIAL

### Uncovering Heterogeneous Associations Between Disaster-Related Trauma and Subsequent Functional Limitations: A Machine-Learning Approach

Koichiro Shiba, PhD\*; Adel Daoud, PhD; Hiroyuki Hikichi, PhD; Aki Yazawa, PhD; Jun Aida, PhD; Katsunori Kondo, PhD; Ichiro Kawachi, PhD

\* Corresponding author. Email: [shiba\\_k@g.harvard.edu](mailto:shiba_k@g.harvard.edu)

#### Table of Contents

- Web Appendix 1. R code for the main analyses.
- Web Appendix 2. Details on our imputation approach.
- Web Appendix 3. On the issue of potential selection bias due to selective attrition.
- Web Table 1. Criteria for levels of physical disability in the Japanese long-term care insurance system.
- Web Table 2. Levels of housing damage and criterion certifying by local governments
- Web Table 3. List of baseline covariates.
- Web Table 4. Distributions of the functional limitation outcomes in 2013 and 2016 among the analytic samples (n = 3,350 for 2013 and n = 2,264 for 2016).
- Web Table 5. Estimates of conditional average treatment effects of home loss on functional limitation in 2013 and 2016.
- Web Table 6. Evaluation of causal forest fit and test of heterogeneity.
- Web Table 7. Pre-disaster characteristics of people at bottom 10% vs. top 10% of the estimated conditional average treatment effect of home loss on certified physical disability level in 2013 and 2016.
- Web Table 8. Pre-disaster characteristics of people at bottom 10% vs. top 10% of the estimated conditional average treatment effect of home loss on total instrumental activities of daily living scores in 2013 and 2016.
- Web Table 9. Pre-disaster characteristics of people at bottom 10% vs top 10% of the estimated conditional average treatment effect of home loss on activities of daily living scores in 2013 and 2016.
- Web Table 10. Sensitivity analysis for associations between home loss and functional limitation in 2013
- Web Table 11. Variable importance ranking.
- Web Table 12. Comparison of pre-disaster characteristics across study samples.
- Web Figure 1. Map of Iwanuma city.
- Web Figure 2. Sensitivity analysis for population average treatment effects of housing damage on functional limitation in 2013 and 2016.
- Web Figure 3. Causal forest calibration plots for outcomes A) IADL, B) ADL, and C) physical disability level.
- Web Figure 4. Sensitivity analysis for conditional average treatment effects of housing damage on functional limitation in 2013 and 2016.
- Web Figure 5. Distribution of estimated conditional average treatment effects of home loss on functional limitation outcomes in 2013 by covariate values.
- Web Figure 6. Distribution of estimated conditional average treatment effects of home loss on functional limitation outcomes in 2016 by covariate values.
- Web Figure 7. Heatmap showing the distribution of estimated conditional average treatment effects of home loss on physical disability levels in 2013 and 2016.
- Web Figure 8. Heatmap showing the distribution of estimated conditional average treatment effects of home loss on instrumental activities of daily living in 2013 and 2016.
- Web Figure 9. Heatmap showing the distribution of estimated conditional average treatment effects of home loss on activities of daily living in 2013 and 2016.
- Web Figure 10. Relationship between degree of property damage and distance from the coastal line. A) Geographic distribution of housing damage in 2013; B) Association between pre-earthquake distance from the coast and housing damage.
- References

Web Appendix 1. R code for the main analyses.

```
library(tidyverse)
library(patchwork)
library(ggsci)
library(broom)
library(gtsummary)
library(grf)
library(ltmle)
library(SuperLearner)
library(sandwich)
```

## 1. Setup

```
df.imputed.2013 <- read.csv("df.imputed.2013.csv")
df.imputed.2016 <- read.csv("df.imputed.2016.csv")

demographic.factors <- c("age_10_meibo", "sex_10_meibo", "mari5st10", "hous2lo10")
ses.factors <- c("educ5_10", "empl3pt10", "s_eqincome_x10")

health.factors <- c("srh_4_10", "bmi_10", "adl_3_10", "iadl10", "iadl10.instrument", "iadl10.cognitive", "iadl10.social", "s_gds_x10", "dgns2ca10", "dgns2rd10", "dgns2st10", "dgns2ht10", "dgns2dm10", "dgns2ob10", "dgns2hl10", "dgns2op10", "dgns2an10", "dgns2fx10", "dgns2ge10", "dgns2lv10", "dgns2ps10", "dgns2vi10", "dgns2he10", "dgns2bw10", "dgns2sl10", "dgns2uk10", "dgns2ot10")

psychosocial.factors <- c("fot_5_10", "cmn5cntr10", "cmn5at10", "cmnt6sp10", "cmnt6hb10", "meet6fr10", "num5fr10", "lsnd2no10", "lstn2no10", "card2no10", "wcar2no10", "acqu4_10", "soc10", "negative.events")
behavioral.factors <- c("smok4_10", "alcl3_10", "fq7prt10", "fq7veg10", "gout6fq10", "hoby2_10")

treatment <- c("hloss")
outcomes <- c("iadl13", "iadl16", "adl3ra13", "adl3ra16", "svy_physical_dis13", "svy_physical_dis16")

covariates <- c(demographic.factors, ses.factors, health.factors, psychosocial.factors, behavioral.factors)
```

## 2. TMLE with SuperLearner for ATEs

```
SL.library <- c("SL.glm", "SL.xgboost", "SL.nnet") # specify candidate estimators for SuperLearner

# function to extract estimates from the output object of ltmle
extract.estimates.ltmle <- function(fit){
```

```

output.TMLE <- summary(fit)
output.TMLE <- output.TMLE$effect.measures
ATE.TMLE <- output.TMLE$ATE %>% as.data.frame()
RR.TMLE <- output.TMLE$RR %>% as.data.frame()
treatment <- output.TMLE$treatment %>% as.data.frame()
control <- output.TMLE$control %>% as.data.frame()
summary.TMLE <- rbind(ATE.TMLE,RR.TMLE,treatment,control)
summary.TMLE <- summary.TMLE %>% filter(long.name == "Additive Treatment Effect")
return(summary.TMLE)
}

# Outcomes in 2013
## ADL
ate.ltmle.2013.adl <- df.imputed.2013 %>%
  select(covariates,hloss,adl3ra13) %>%
  ltmle(
    Anodes = "hloss",
    Ynodes = "adl3ra13",
    abar = list(1,0),
    SL.library = SL.library
  )
## IADL
ate.ltmle.2013.iadl <- df.imputed.2013 %>%
  select(covariates,hloss,iadl13) %>%
  ltmle(
    Anodes = "hloss",
    Ynodes = "iadl13",
    abar = list(1,0),
    SL.library = SL.library
  )
## Certified physical disability levels
ate.ltmle.2013.ltc <- df.imputed.2013 %>%
  select(covariates,hloss,svy_physical_dis13) %>%
  ltmle(
    Anodes = "hloss",
    Ynodes = "svy_physical_dis13",
    abar = list(1,0),
    SL.library = SL.library
  )

# Create a dataframe that contains all ATE estimates
ATE.estimates.2013 <- rbind(
  ate.ltmle.2013.adl %>% extract.estimates.ltmle() %>% mutate(outcome = "ADL",
  , year = 2013),
  ate.ltmle.2013.iadl %>% extract.estimates.ltmle() %>% mutate(outcome = "IADL",
  , year = 2013),
  ate.ltmle.2013.ltc %>% extract.estimates.ltmle() %>% mutate(outcome = "Physical Disability",
  , year = 2013)

```

```

) %>%
  rename(CI.low = CI.2.5., CI.up = CI.97.5.) %>%
  select(outcome, year, estimate, CI.low, CI.up, pvalue) %>%
  mutate_if(is.numeric, round, 3)

# Outcomes in 2016

## ADL
ate.ltmle.2016.adl <- df.imputed.2016 %>%
  select(covariates, hloss, adl3ra16) %>%
  ltmle(
    Anodes = "hloss",
    Ynodes = "adl3ra16",
    abar = list(1, 0),
    SL.library = SL.library
  )

## IADL
ate.ltmle.2016.iadl <- df.imputed.2016 %>%
  select(covariates, hloss, iadl16) %>%
  ltmle(
    Anodes = "hloss",
    Ynodes = "iadl16",
    abar = list(1, 0),
    SL.library = SL.library
  )

## Certified physical disability levels
ate.ltmle.2016.ltc <- df.imputed.2016 %>%
  select(covariates, hloss, svy_physical_dis16) %>%
  ltmle(
    Anodes = "hloss",
    Ynodes = "svy_physical_dis16",
    abar = list(1, 0),
    SL.library = SL.library
  )

# Create a dataframe that contains all ATE estimates
ATE.estimates.2016 <- rbind(
  ate.ltmle.2016.adl %>% extract.estimate.ltmle() %>% mutate(outcome = "ADL",
  , year = 2016),
  ate.ltmle.2016.iadl %>% extract.estimate.ltmle() %>% mutate(outcome = "IADL",
  L", year = 2016),
  ate.ltmle.2016.ltc %>% extract.estimate.ltmle() %>% mutate(outcome = "Physical Disability",
  ical Disability", year = 2016)
) %>%
  rename(CI.low = CI.2.5., CI.up = CI.97.5.) %>%
  select(outcome, year, estimate, CI.low, CI.up, pvalue) %>%
  mutate_if(is.numeric, round, 3)

```

## 2.1. Figure 2

```
# Prepare a dataframe for plotting
df.p =
  bind_rows(
    ATE.estimates.2013 %>% mutate(year = "2013"), # change the variable "year"
    to a character string
    ATE.estimates.2016 %>% mutate(year = "2016")
  ) %>%
  mutate(
    outcome = factor(outcome, levels = c("IADL", "ADL", "Physical Disability"))
  )

# Create a vector of CI results
ci_str <- c()
for (i in seq_along(df.p$CI.low)){
  ci_str <- c(ci_str, str_interp("({format(round(df.p$CI.low[i],2),nsmall = 2
)}, {format(round(df.p$CI.up[i],2),nsmall = 2)}))")
}

df.p %>%
  ggplot(aes(x = outcome, y = estimate, ymin = CI.low, ymax = CI.up, shape =
year)) +
  geom_errorbar(position = position_dodge(-0.4),
                width = 0.2) +
  geom_point(position = position_dodge(-0.4),
             size = 2.5) +
  geom_hline(yintercept = 0,
            linetype = "dashed") +
  coord_flip(clip = "off") +
  ylab("Estimated Population Average Effect of Home Loss") +
  xlab("") +
  scale_shape_discrete(name = "Year") +
  theme_classic() +
  theme(legend.position = "bottom",
        axis.line.y = element_line(color = "transparent"),
        axis.text.y = element_text(hjust = 0, size = 12, color = "black"),
        text = element_text(color = "black", size = 12, family = "serif"),
        axis.ticks.y = element_blank(),
        axis.text.x = element_text(size = 12, color = "black"),
        legend.text = element_text(size = 12, color = "black"),
        plot.margin = unit(c(2.8, 10, 0, 1), "lines")
  )
```

## 3. Generalized Random Forest for CATEs

```
# Reference: https://bookdown.org/halflearned/ml-ci-tutorial/hte-i-binary-treatment.html#via-grf
## Set up for cross-fitting
```

```

num.rankings <- 5
num.folds <- 20

n.2013 = df.imputed.2013 %>% nrow()
n.2016 = df.imputed.2016 %>% nrow()

folds.2013 <- sort(seq(n.2013) %% num.folds) + 1
folds.2016 <- sort(seq(n.2016) %% num.folds) + 1

## Outcomes in 2013
set.seed(777)

forest.iadl2013 <- causal_forest(df.imputed.2013[covariates], # covariate matrix
                                df.imputed.2013[,outcomes[1]], # outcome vector
                                df.imputed.2013[,treatment[1]], # exposure vector
                                num.trees = 2000, # grow 2000 trees
                                tune.parameters = "all",
                                clusters = folds.2013) # tune parameters

preds.iadl2013 <- predict(forest.iadl2013, estimate.variance = F) %>% # predict CATEs
  mutate(outcome = "IADL", year = "2013")

forest.adl2013 <- causal_forest(df.imputed.2013[covariates],
                                df.imputed.2013[,outcomes[3]],
                                df.imputed.2013[,treatment[1]],
                                num.trees = 2000,
                                tune.parameters = "all",
                                clusters = folds.2013)

preds.adl2013 <- predict(forest.adl2013, estimate.variance = F) %>%
  mutate(outcome = "ADL", year = "2013")

forest.disability2013 <- causal_forest(df.imputed.2013[covariates],
                                        df.imputed.2013[,outcomes[5]],
                                        df.imputed.2013[,treatment[1]],
                                        num.trees = 2000,
                                        tune.parameters = "all",
                                        clusters = folds.2013)

preds.disability2013 <- predict(forest.disability2013, estimate.variance = F)
%>%
  mutate(outcome = "Physical Disability", year = "2013")

preds.2013 <- rbind(preds.adl2013,preds.iadl2013,preds.disability2013)

```

```

## Outcomes in 2016
forest.iadl2016 <- causal_forest(df.imputed.2016[covariates],
                                df.imputed.2016[,outcomes[2]],
                                df.imputed.2016[,treatment[1]],
                                num.trees = 2000,
                                tune.parameters = "all",
                                clusters = folds.2016)

preds.iadl2016 <- predict(forest.iadl2016, estimate.variance = F) %>%
  mutate(outcome = "IADL", year = "2016")

forest.adl2016 <- causal_forest(df.imputed.2016[covariates],
                                df.imputed.2016[,outcomes[4]],
                                df.imputed.2016[,treatment[1]],
                                num.trees = 2000,
                                tune.parameters = "all",
                                clusters = folds.2016)

preds.adl2016 <- predict(forest.adl2016, estimate.variance = F) %>%
  mutate(outcome = "ADL", year = "2016")

forest.disability2016 <- causal_forest(df.imputed.2016[covariates],
                                       df.imputed.2016[,outcomes[6]],
                                       df.imputed.2016[,treatment[1]],
                                       num.trees = 2000,
                                       tune.parameters = "all",
                                       clusters = folds.2016)

preds.disability2016 <- predict(forest.disability2016, estimate.variance = F)
%>%
  mutate(outcome = "Physical Disability", year = "2016")

preds.2016 <- rbind(preds.adl2016,preds.iadl2016,preds.disability2016)

```

### 3.1 Test for heterogeneity

#### 3.1.1 Comparison of those who were above/below median CATEs

```

test.heterogeneity <- function(preds,data,exposure,outcome){
  tau.hat <- preds$predictions
  high_effect = tau.hat > median(tau.hat)

  ate.high = data %>%
    filter(high_effect) %>%
    select(covariates,exposure,outcome) %>%
    ltmle(

```

```

    Anodes = exposure,
    Ynodes = outcome,
    abar = list(1,0),
    SL.library = SL.library
  ) %>%
  extract.estimate.ltmle() %>%
  mutate(subset = "high")

ate.low = data %>%
  filter(!high_effect) %>%
  select(covariates,exposure,outcome) %>%
  ltmle(
    Anodes = exposure,
    Ynodes = outcome,
    abar = list(1,0),
    SL.library = SL.library
  ) %>%
  extract.estimate.ltmle() %>%
  mutate(subset = "low")

ates <- rbind(ate.high, ate.low)
ate.diff <- ate.high$estimate - ate.low$estimate
ci.low <- (ate.high$estimate - ate.low$estimate) - qnorm(0.975)*sqrt(ate.high$std.dev^2 + ate.low$std.dev^2)
ci.up <- (ate.high$estimate - ate.low$estimate) + qnorm(0.975)*sqrt(ate.high$std.dev^2 + ate.low$std.dev^2)
p.value <- 2*pnorm(-abs((ate.high$estimate - ate.low$estimate)/sqrt(ate.high$std.dev^2 + ate.low$std.dev^2)))
test.result <- cbind(ate.diff,ci.low,ci.up,p.value) %>% as.tibble() %>% mutate_if(is.numeric,round,3)
output<- list()
output[[1]] <- ates
output[[2]] <- test.result
return(output)
}

test1 <- test.heterogeneity(preds.iadl2013,df.imputed.2013,"hloss","iadl13")
test2 <- test.heterogeneity(preds.iadl2016,df.imputed.2016,"hloss","iadl16")
test3 <- test.heterogeneity(preds.adl2013,df.imputed.2013,"hloss","adl3ra13")
test4 <- test.heterogeneity(preds.adl2016,df.imputed.2016,"hloss","adl3ra16")
test5 <- test.heterogeneity(preds.disability2013,df.imputed.2013,"hloss","svy_physical_dis13")
test6 <- test.heterogeneity(preds.disability2016,df.imputed.2016,"hloss","svy_physical_dis16")

median.ates <- list(test1[[1]],test2[[1]],test3[[1]],test4[[1]],test5[[1]],test6[[1]]) %>% bind_rows()
median.ates.pvalues <- list(test1[[2]],test2[[2]],test3[[2]],test4[[2]],test5[[2]],test6[[2]]) %>% bind_rows()

```



### 3.1.2. Calibration test

```
calibration_test <- function(forest, year, outcome){
  test_calibration(forest) %>%
  tidy() %>%
  mutate(year = year,
          outcome = outcome) %>%
  select(outcome, year, term, estimate, p.value)
}

rbind(
  calibration_test(forest.iadl2013, "2013", "IADL"),
  calibration_test(forest.iadl2016, "2016", "IADL"),
  calibration_test(forest.adl2013, "2013", "ADL"),
  calibration_test(forest.adl2016, "2016", "ADL"),
  calibration_test(forest.disability2013, "2013", "Physical Disability"),
  calibration_test(forest.disability2016, "2016", "Physical Disability")
) %>%
mutate_if(is.numeric, round, 2) %>%
filter(term == "differential.forecast.prediction")
```

### 3.1.3. Calibration plot

*# Reference: <https://bookdown.org/halflearned/ml-ci-tutorial/hte-i-binary-treatment.html#via-grf>*

```
ATE.ranking.2013 = function(forest, outcome){
  tau.hat = predict(forest)$predictions
  e.hat <- forest$W.hat #  $P[W=1|X]$ 
  m.hat <- forest$Y.hat #  $E[Y|X]$ 
  W = df.imputed.2013[, "hloss"]
  Y = df.imputed.2013[, outcome]

  ranking <- rep(NA, n.2013)
  for (fold in seq(num.folds)) {
    tau.hat.quantiles <- quantile(tau.hat[folds.2013 == fold], probs = seq(0,
    1, by=1/num.rankings))
    ranking[folds.2013 == fold] <- cut(tau.hat[folds.2013 == fold], tau.hat.q
    uantiles, include.lowest=TRUE, labels=seq(num.rankings))
  }

  mu.hat.0 <- m.hat - e.hat * tau.hat #  $E[Y|X, W=0] = E[Y|X] - e(X)*tau(X)$ 
  mu.hat.1 <- m.hat + (1 - e.hat) * tau.hat #  $E[Y|X, W=1] = E[Y|X] + (1 - e(X))*tau(X)$ 

  # AIPW scores
  aipw.scores <- tau.hat + W / e.hat * (Y - mu.hat.1) - (1 - W) / (1 - e.hat
  ) * (Y - mu.hat.0)
  ols <- lm(aipw.scores ~ 0 + factor(ranking))
```

```

forest.ate <- data.frame("aipw", paste0("Q", seq(num.rankings)), coeftest(ols,
vcov=vcovHC(ols, "HC2"))[,1:2])
colnames(forest.ate) <- c("method", "ranking", "estimate", "std.err")
rownames(forest.ate) <- NULL # just for display
forest.ate %>%
  mutate(year = "2013")
}

```

```

ATE.ranking.2016 = function(forest, outcome){
  tau.hat = predict(forest)$predictions
  e.hat <- forest$W.hat
  m.hat <- forest$Y.hat
  W = df.imputed.2016[, "hloss"]
  Y = df.imputed.2016[, outcome]

  ranking <- rep(NA, n.2016)
  for (fold in seq(num.folds)) {
    tau.hat.quantiles <- quantile(tau.hat[folds.2016 == fold], probs = seq(0,
1, by=1/num.rankings))
    ranking[folds.2016 == fold] <- cut(tau.hat[folds.2016 == fold], tau.hat.q
uantiles, include.lowest=TRUE, labels=seq(num.rankings))
  }

  mu.hat.0 <- m.hat - e.hat * tau.hat #  $E[Y|X, W=0] = E[Y|X] - e(X)*tau(X)$ 
  mu.hat.1 <- m.hat + (1 - e.hat) * tau.hat #  $E[Y|X, W=1] = E[Y|X] + (1 - e(X))*tau(X)$ 

  # AIPW scores
  aipw.scores <- tau.hat + W / e.hat * (Y - mu.hat.1) - (1 - W) / (1 - e.hat)
  * (Y - mu.hat.0)
  ols <- lm(aipw.scores ~ 0 + factor(ranking))
  forest.ate <- data.frame("aipw", paste0("Q", seq(num.rankings)), coeftest(ols,
vcov=vcovHC(ols, "HC2"))[,1:2])
colnames(forest.ate) <- c("method", "ranking", "estimate", "std.err")
rownames(forest.ate) <- NULL # just for display
forest.ate %>%
  mutate(year = "2016")
}

```

```

p1 = rbind(
  ATE.ranking.2013(forest.iadl2013, "iadl13"),
  ATE.ranking.2016(forest.iadl2016, "iadl16")
) %>%
  ggplot(aes(x = ranking, y = estimate, color=year)) +
  geom_point(position=position_dodge(0.2)) +
  geom_errorbar(aes(ymin=estimate-1.96*std.err, ymax=estimate+1.96*std.err),
width=.2, position=position_dodge(0.2)) +
  ylab("Average CATE") + xlab("Ranking") +

```

```

ggtitle("IADL outcome") +
theme_bw() +
theme(legend.position="bottom", legend.title = element_blank())

p2 = rbind(
  ATE.ranking.2013(forest.adl2013,"adl3ra13"),
  ATE.ranking.2016(forest.adl2016,"adl3ra16")
) %>%
ggplot(aes(x = ranking, y = estimate, color=year)) +
  geom_point(position=position_dodge(0.2)) +
  geom_errorbar(aes(ymin=estimate-1.96*std.err, ymax=estimate+1.96*std.err),
width=.2, position=position_dodge(0.2)) +
  ylab("Average CATE") + xlab("Ranking") +
  ggtitle("ADL outcome") +
  theme_bw() +
  theme(legend.position="bottom", legend.title = element_blank())

p3 = rbind(
  ATE.ranking.2013(forest.disability2013,"svy_physical_dis13"),
  ATE.ranking.2016(forest.disability2016,"svy_physical_dis16")
) %>%
ggplot(aes(x = ranking, y = estimate, color=year)) +
  geom_point(position=position_dodge(0.2)) +
  geom_errorbar(aes(ymin=estimate-1.96*std.err, ymax=estimate+1.96*std.err),
width=.2, position=position_dodge(0.2)) +
  ylab("Average CATE") + xlab("Ranking") +
  ggtitle("Disability level") +
  theme_bw() +
  theme(legend.position="bottom", legend.title = element_blank())

p1+p2+p3 # use the patchwork package to combine two plots

```

### 3.2. Create Figure 3

```

# Create density plots for estimated CATEs.
p.density.2013.dis <- preds.2013 %>%
  mutate(
    outcome = factor(outcome, levels = c("Physical Disability","ADL","IADL"))
  ) %>%
  ggplot(aes(x = predictions, fill = outcome)) +
  geom_density(alpha = 0.5) +
  geom_vline(xintercept = 0, linetype = "dashed")+
  xlab("Estimated Conditional Average Treatment Effect of Home Loss") +
  ylab("Density") +
  labs(fill = "Outcome Assessed",color = "Outcome Assessed") +
  theme_bw() +
  scale_fill_nejm() +
  ggtitle("(A) Functional Disability 2.5 Years After the Earthquake Onset") +
  theme(text = element_text(family = "serif",size = 12),
        title = element_text(size = 12),

```

```

    axis.text = element_text(size = 12),
    plot.title = element_text(hjust = 0.5)) +
scale_x_continuous(limits = c(-1.5,0.5))

p.density.2016.dis <- preds.2016 %>%
mutate(
  outcome = factor(outcome, levels = c("Physical Disability","ADL","IADL"))
) %>%
ggplot(aes(x = predictions, fill = outcome)) +
geom_density(alpha = 0.5) +
geom_vline(xintercept = 0, linetype = "dashed")+
xlab("Estimated Conditional Average Treatment Effect of Home Loss") +
ylab("Density") +
labs(fill = "Outcome Assessed",color = "Outcome Assessed") +
theme_bw() +
scale_fill_nejm() +
ggtitle("(B) Functional Disability 5.5 Years After the Earthquake Onset") +
theme(text = element_text(family = "serif",size = 12),
  title = element_text(size = 12),
  axis.text = element_text(size = 12),
  plot.title = element_text(hjust = 0.5)) +
scale_x_continuous(limits = c(-1.5,0.5))

p.density.2013.dis/p.density.2016.dis # use the patchwork package to combine
two plots

```

#### 4. Compare extreme cases

```

compare.extremecases.2013 <- function(outcome){
  preds <- paste("preds",outcome,sep=".")

  data <- df.imputed.2013 %>%
    mutate(folds = folds.2013,
           preds = (!!as.name(preds))) %>%
    group_by(folds) %>% # extract extreme groups by folds
    mutate(cate.percentile = ifelse(preds > quantile(preds, probs = 0.9),"Above
ve 90 percentile (Resilient)",ifelse(preds < quantile(preds, probs = 0.1), "B
elow 10 percentile (Vulnerable)",NA))) %>%
    filter(!is.na(cate.percentile)) %>%
    ungroup()

  # use the gtsummary package to create a table
  table <- data %>%
    select(preds,covariates,cate.percentile) %>%
    tbl_summary(
      by = cate.percentile,
      statistic = list(all_continuous() ~ "{mean} ({sd})"),
      type = list(c(cum.cond,adl_3_10) ~ "continuous"),
      digits = all_continuous() ~ 2,

```

```

    ) %>%
    add_p(
      test = list(all_continuous() ~ "wilcox.test",
                  all_categorical() ~ "fisher.test")
    ) %>%
    bold_labels()
  return(table)
}

compare.extremecases.2016 <- function(outcome){
  preds <- paste("preds",outcome,sep=".")

  data <- df.imputed.2016 %>%
    mutate(folds = folds.2016,
           preds = (!!as.name(preds))) %>%
    group_by(folds) %>%
    mutate(cate.percentile = ifelse(preds > quantile(preds, probs = 0.9), "Above 90 percentile (Resilient)",
                                     ifelse(preds < quantile(preds, probs = 0.1), "Below 10 percentile (Vulnerable)", NA))) %>%
    filter(!is.na(cate.percentile)) %>%
    ungroup()

  table <- data %>%
    select(preds,covariates,cate.percentile) %>%
    tbl_summary(
      by = cate.percentile,
      statistic = list(all_continuous() ~ "{mean} ({sd})"),
      type = list(c(cum.cond,adl_3_10) ~ "continuous"),
      digits = all_continuous() ~ 2,
    ) %>%
    add_p(
      test = list(all_continuous() ~ "wilcox.test",
                  all_categorical() ~ "fisher.test")
    ) %>%
    bold_labels()
  return(table)
}

# use the functions above to create a table for both outcome assessment years
compare.acrossyears <- function(outcome){
  tbl.2013 = compare.extremecases.2013(outcome)
  tbl.2016 = compare.extremecases.2016(outcome)
  tbl_merge(
    tbls = list(tbl.2013,tbl.2016),
    tab_spanner = c("2013","2016")
  )
}

# Merge CATE estimates from grf

```

```

df.imputed.2013$preds.iadl <- preds.iadl2013$predictions
df.imputed.2013$preds.adl <- preds.adl2013$predictions
df.imputed.2013$preds.disability <- preds.disability2013$predictions

df.imputed.2016$preds.iadl <- preds.iadl2016$predictions
df.imputed.2016$preds.adl <- preds.adl2016$predictions
df.imputed.2016$preds.disability <- preds.disability2016$predictions

compare.acrossyears("iadl")
compare.acrossyears("adl")
compare.acrossyears("disability")

```

## 5. Variable importance

*# Show top three variables that were most often used in growing trees.*

```

rbind(
  variable_importance(forest.iadl2013) %>%
    tidy() %>%
    mutate(varname = covariates) %>%
    arrange(desc(x)) %>%
    mutate_if(is.numeric, round, 3) %>%
    slice(1:3) %>%
    mutate(outcome = "IADL",
           year = 2013),

  variable_importance(forest.iadl2016) %>%
    tidy() %>%
    mutate(varname = covariates) %>%
    arrange(desc(x)) %>%
    mutate_if(is.numeric, round, 3) %>%
    slice(1:3) %>%
    mutate(outcome = "IADL",
           year = 2016),

  variable_importance(forest.adl2013) %>%
    tidy() %>%
    mutate(varname = covariates) %>%
    arrange(desc(x)) %>%
    mutate_if(is.numeric, round, 3) %>%
    slice(1:3) %>%
    mutate(outcome = "ADL",
           year = 2013),

  variable_importance(forest.disability2013) %>%
    tidy() %>%
    mutate(varname = covariates) %>%
    arrange(desc(x)) %>%
    mutate_if(is.numeric, round, 3) %>%
    slice(1:3) %>%
    mutate(outcome = "Disability",

```

```

    year = 2013)
)

```

## 6. Heat maps

```

# IADL in 2013
df.imputed.2013 %>%
  select(age_10_meibo, soc10, s_eqincome_x10, preds.iadl) %>%
  mutate(age.cat = gtools::quantcut(age_10_meibo, 4),
         soc.cat = gtools::quantcut(soc10,4),
         income.med = ifelse(s_eqincome_x10 >= median(s_eqincome_x10), "Income
≥ median (202,000 yen)", "Income < median (202,000 yen)")) %>%
  group_by(age.cat, soc.cat, income.med) %>%
  summarise(mean = mean(preds.iadl), sd = sd(preds.iadl)) %>%
  mutate(result = paste0(signif(mean,3), "\n", ("", signif(sd,3), ""))) %>% # cre
ate labels
  ggplot(aes(x = age.cat, y = soc.cat)) +
  geom_tile(aes(fill = mean)) +
  geom_text(aes(label = result), family = "serif") +
  scale_fill_gradient2(name = "Mean CATEs", limits = c(-0.95,0.1), breaks = c
(-0.9,-0.6,-0.3,0)) +
  facet_wrap(vars(income.med)) +
  xlab("Age") +
  ylab("Sense of Coherence Score") +
  theme(legend.position = "bottom",
        legend.key.width = unit(2,"cm"),
        text = element_text(size = 12, family = "serif"),
        strip.text = element_text(size = 12, family = "serif"),
        axis.text = element_text(size = 12, family = "serif")) +
  guides(fill = guide_colorbar(reverse = T)) +
  ggtitle("A) Outcome: Instrumental Activities of Daily Living in 2013")

# IADL in 2016
df.imputed.2016 %>%
  select(age_10_meibo, soc10, meet6fr10, preds.iadl) %>%
  mutate(age.cat = gtools::quantcut(age_10_meibo, 4),
         soc.cat = gtools::quantcut(soc10,4),
         meet.med = ifelse(meet6fr10 > 3, "Meeting friends ≤ 1-2 times a month
", "Meeting friends ≥ once a week")) %>%
  group_by(age.cat, soc.cat, meet.med) %>%
  summarise(mean = mean(preds.iadl), sd = sd(preds.iadl)) %>%
  mutate(result = paste0(signif(mean,3), "\n", ("", signif(sd,3), ""))) %>%
  ggplot(aes(x = age.cat, y = soc.cat)) +
  geom_tile(aes(fill = mean)) +
  geom_text(aes(label = result), family = "serif") +
  scale_fill_gradient2(name = "Mean CATEs", limits = c(-0.95,0.1), breaks = c
(-0.9,-0.6,-0.3,0)) +
  facet_wrap(vars(meet.med)) +
  xlab("Age") +

```

```

ylab("Sense of Coherence Score") +
theme(legend.position = "bottom",
      legend.key.width = unit(2,"cm"),
      text = element_text(size = 12, family = "serif"),
      strip.text = element_text(size = 12, family = "serif"),
      axis.text = element_text(size = 12, family = "serif")) +
guides(fill = guide_colorbar(reverse = T)) +
ggtitle("B) Outcome: Instrumental Activities of Daily Living in 2016")

```

#### # ADL in 2013

```

df.imputed.2013 %>%
  select(age_10_meibo, gout6fq10, s_gds_x10, preds.adl) %>%
  mutate(age.cat = gtools::quantcut(age_10_meibo, 4),
         gout.cat = ifelse(gout6fq10 == 1, "Almost everyday", ifelse(gout6fq10
== 2, "2-3 times a week", "≤ Once a week")),
         dep.cat = ifelse(s_gds_x10 >= 5, "Depressed", "Not depressed")
  ) %>%
  group_by(age.cat, gout.cat, dep.cat) %>%
  summarise(mean = mean(preds.adl), sd = sd(preds.adl)) %>%
  mutate(result = paste0(signif(mean,3), "\n", "(", signif(sd,3), ")")) %>%
  ggplot(aes(x = age.cat, y = gout.cat)) +
  geom_tile(aes(fill = mean)) +
  geom_text(aes(label = result), family = "serif") +
  scale_fill_gradient2(name = "Mean CATEs",
                      low = "navy",
                      limits = c(-0.25,0),
                      breaks = c(-0.25,-0.2,-0.15,-0.10,-0.05,0)) +
  scale_y_discrete(labels = function(x) str_wrap(x, width = 10)) +
  facet_wrap(vars(dep.cat)) +
  xlab("Age") +
  ylab("Frequency of going out") +
  theme(legend.position = "bottom",
        legend.key.width = unit(2,"cm"),
        text = element_text(size = 12, family = "serif"),
        strip.text = element_text(size = 12, family = "serif"),
        axis.text = element_text(size = 12, family = "serif")) +
  guides(fill = guide_colorbar(reverse = T)) +
  ggtitle("A) Outcome: Activities of Daily Living in 2013")

```

#### # Disability Levels in 2013

```

df.imputed.2013 %>%
  select(age_10_meibo, iadl10, s_eqincome_x10, preds.disability) %>%
  mutate(age.cat = gtools::quantcut(age_10_meibo, 4),
         iadl.cat = gtools::quantcut(iadl10,4),
         income.med = ifelse(s_eqincome_x10 >= median(s_eqincome_x10), "Income
≥ median (202,000 yen)", "Income < median (202,000 yen)")
  ) %>%
  group_by(age.cat, iadl.cat, income.med) %>%
  summarise(mean = mean(preds.disability), sd = sd(preds.disability)) %>%
  mutate(result = paste0(signif(mean,3), "\n", "(", signif(sd,3), ")")) %>%

```



```

ggplot(aes(x = age.cat, y = iadl.cat)) +
  geom_tile(aes(fill = mean)) +
  geom_text(aes(label = result), family = "serif") +
  scale_fill_gradient2(name = "Mean CATEs",
                       low = "green4",
                       limits = c(-0.6,0),
                       breaks = c(-0.6,-0.4,-0.2,0)) +
  facet_wrap(vars(income.med)) +
  xlab("Age") +
  ylab("IADL") +
  theme(legend.position = "bottom",
        legend.key.width = unit(2,"cm"),
        text = element_text(size = 12, family = "serif"),
        strip.text = element_text(size = 12, family = "serif"),
        axis.text = element_text(size = 12, family = "serif")) +
  guides(fill = guide_colorbar(reverse = T)) +
  ggtitle("B) Outcome: Levels of Certified Physical Disability in 2013")

```

## Web Appendix 2. Details on our imputation approach

To impute missing data, we used the MissForest, which is a non-parametric imputation approach based on the random forest algorithm. (1) Random forest algorithm learns ensembles of regression or classification trees, each tree fitting a different resampled population and covariate set, to estimate and reduce model variance. (2) Each tree learns a set of rules (e.g.,  $\text{age} \geq 75$  vs.  $\text{age} < 75$ ) which partition the population of units into different leaves of the tree. The predicted outcome for a new unit is the average of outcomes for observed units assigned to the same leaf; the prediction of the forest is the average of the predictions of all trees. MissForest first trains a random forest on observed values and then use the trained random forest to predict (i.e., impute) missing values; it repeats this process iteratively until the difference between the newly imputed data and the previous one increases for the first time. MissForest allows imputation of missing data with mixed variable types (continuous, binary, and categorical). For the MissForest algorithm, we used all the variables (i.e., the 55 pre-disaster characteristics, home loss, and the three functional limitation outcomes in 2013 and 2016).

### Web Appendix 3. On the issue of potential selection bias due to selective attrition.

Methods to “correct” for selection bias (e.g., inverse probability weighting) require information of home loss status both among the censored individuals and the uncensored individuals. Unfortunately, home loss status was measured only among people who participated in the 2013 wave. In other words, we cannot correct for the sample attrition due to non-participation in the 2013 follow-up survey or deaths that occurred before the 2013 survey wave because we do not have the exposure (home loss) information among those censored individuals; hence, censoring weights could not be computed.

To assess how likely is selection bias due to selective attrition, we compared pre-disaster characteristics among 1) the whole sample disaster survivors (n=4,299; baseline study participants who did not have disability before the disaster and were alive on 2011/3/11 and not killed by the tsunami), 2) the analytic sample for the outcomes in 2013 (n=3,350), and 3) the analytic sample for the outcomes in 2016 (n=2,664). We also checked the distribution of distance from the coast to home address in 2010 (<1,000m versus  $\geq 1,000$ m), which is highly correlated with the degree of property damage from the tsunami in 2011 (please see Web Figure 8), as a proxy of home loss. This variable was available among survivors who did not participate in the post-disaster waves; hence, it provides an approximation of how attrition might be associated with the level of the exposure (home loss). The result is shown in Web Table 12. We found that property damage -- proxied by pre-disaster distance of the individual's home address from the coast -- was slightly less prevalent in the samples with greater attrition, suggesting that the exposed individuals (people who suffered housing damage) were more likely to drop out over time. Moreover, we found that attrition was likely associated with pre-disaster characteristics that may also increase the risk of future functional limitations; for instance, compared to the sample of disaster survivors with least attrition (n=4,299), the group with the greatest attrition in 2016 (n=2,664) tended to be younger, less likely to be depressed, and had higher IADL before the disaster. Although the difference in pre-disaster characteristics across study samples was overall small, this kind of selective attrition will likely underestimate the true causal effect of home loss, as demonstrated by Shiba et al (2021).(3)

**Web Table 1. Criteria for levels of physical disability in the Japanese long-term care insurance system.**

| Disability Rank | Outcome value | Criteria                                                                                                                                                                      |
|-----------------|---------------|-------------------------------------------------------------------------------------------------------------------------------------------------------------------------------|
|                 | 9             | No physical disability/not requesting care services.                                                                                                                          |
| J               |               | Individuals in this rank have some functional disability but is almost completely independent in everyday activities and can go outside unassisted.                           |
| J1              | 8             | Can go outside using public transportations, etc.                                                                                                                             |
| J2              | 7             | Can go outside to the immediate neighborhood.                                                                                                                                 |
| A               |               | Individuals in this rank are normally independent in daily living activities at home but cannot go out without assistance.                                                    |
| A1              | 6             | Can go outside if assisted and is out of bed for most of the day.                                                                                                             |
| A2              | 5             | Rarely go outside and get in and out of bed frequently during the daytime.                                                                                                    |
| B               |               | Individuals in this rank require some assistance in performing activities indoors and spend times mostly in bed during the daytime; however, they can keep a seated position. |
| B1              | 4             | Can independently use a wheelchair to get off a bed for meals and toileting.                                                                                                  |
| B2              | 3             | Need assistance for using a wheelchair to move.                                                                                                                               |
| C               |               | Individuals in this rank are in bed all day and require assistance for toileting, eating, and changing clothes.                                                               |
| C1              | 2             | Can turn over in a bed without support.                                                                                                                                       |
| C2              | 1             | Cannot turn over in a bed independently.                                                                                                                                      |

**Web Table 2. Levels of housing damage and criterion certifying by local governments**

| <b>Grade</b>                     | <b>Criterion <sup>a</sup></b>                                                                                                    |
|----------------------------------|----------------------------------------------------------------------------------------------------------------------------------|
| No damage                        | Not affected.                                                                                                                    |
| Partial                          | Under 20% structural damage or inundation below the floor.                                                                       |
| Minor                            | 20% to 40% structural damage or inundation above the floor.                                                                      |
| Major                            | 40% to 50% structural damage or inundation approximately 1 meter above the floor.                                                |
| Complete destruction (Home loss) | Over 50% structural damage, inundation up to ceiling in the first floor, or completely washed away. Uninhabitable beyond repair. |

<sup>a</sup> Structural damage was observed in roof, walls, and foundation.

**Web Table 3. List of baseline covariates.**

| Variable Type | Measurement                                                                                                                                                                                                                                                                                                                            | Coding                                                                                                             |
|---------------|----------------------------------------------------------------------------------------------------------------------------------------------------------------------------------------------------------------------------------------------------------------------------------------------------------------------------------------|--------------------------------------------------------------------------------------------------------------------|
| Demographic   | Sex                                                                                                                                                                                                                                                                                                                                    | 1= Man; 2 = Women                                                                                                  |
| Demographic   | Age                                                                                                                                                                                                                                                                                                                                    | As continuous                                                                                                      |
| Demographic   | Marital status                                                                                                                                                                                                                                                                                                                         | 1 = Married; 2 = Widowed; 3 = Divorced; 4 = Single; 5 = Others                                                     |
| Demographic   | Living alone                                                                                                                                                                                                                                                                                                                           | 0 = No; 1 = Yes                                                                                                    |
| Socioeconomic | Education attainment                                                                                                                                                                                                                                                                                                                   | 1= Less than 6 years; 2 = 6-9 years; 3 = 10-12 years; 4 = 13-15 years; 5 = Others                                  |
| Socioeconomic | Employment status                                                                                                                                                                                                                                                                                                                      | 1= Working; 2 = Retired; 3 = Never worked                                                                          |
| Socioeconomic | Equalized household income                                                                                                                                                                                                                                                                                                             | As continuous                                                                                                      |
| Health        | Self-rated health                                                                                                                                                                                                                                                                                                                      | 1= Very good; 2 = Good; 3 = Not good; 4 = Bad                                                                      |
| Health        | Body Mass Index                                                                                                                                                                                                                                                                                                                        | As continuous                                                                                                      |
| Health        | Depressive Symptoms                                                                                                                                                                                                                                                                                                                    | As continuous                                                                                                      |
| Health        | ADL                                                                                                                                                                                                                                                                                                                                    | 1= support needed completely, 2 = support needed partially, and 3 = no help needed                                 |
| Health        | IADL (total scores as well as subscales of instrumental, intellectual, and social IADL)                                                                                                                                                                                                                                                | As continuous                                                                                                      |
| Health        | All self-reported diagnosis of 20 major diseases (cancer, heart diseases, stroke, hypertension, diabetes, obesity, hyperlipidemia, osteoporosis, arthritis, fracture, respiratory diseases, gastrointestinal diseases, liver diseases, psychiatric diseases, dysphagia, visual impairment, hearing loss, dysuria, insomnia, and other) | 0 = No; 1 = Yes for each disease.                                                                                  |
| Psychosocial  | Trust in local people (Can you trust your local people?)                                                                                                                                                                                                                                                                               | 1 = Very much; 2 = Moderate; 3 = Neutral; 4 = Not very much; 5 = Not at all                                        |
| Psychosocial  | Mutual help in your community                                                                                                                                                                                                                                                                                                          | 1 = Very much; 2 = Moderate; 3 = Neutral; 4 = Not very much; 5 = Not at all                                        |
| Psychosocial  | How much do you attach your community?                                                                                                                                                                                                                                                                                                 | 1 = Very much; 2 = Moderate; 3 = Neutral; 4 = Not very much; 5 = Not at all                                        |
| Psychosocial  | Participation in sport clubs                                                                                                                                                                                                                                                                                                           | 1 = Everyday; 2 = 2-3times a week; 3 = once a week; 4 = 1-2 times a month; 5 = a few times a year; 6 = not at all  |
| Psychosocial  | Participation in hobby clubs                                                                                                                                                                                                                                                                                                           | 1 = Everyday; 2 = 2-3 times a week; 3 = once a week; 4 = 1-2 times a month; 5 = a few times a year; 6 = not at all |
| Psychosocial  | Meeting friends                                                                                                                                                                                                                                                                                                                        | 1 = Every day; 2 =2-3 times a year; 3 = once a week; 4 = 1-2 times a month; 5 = a few times a year, 6 = Not at all |
| Psychosocial  | How many friends did you meet in the past month?                                                                                                                                                                                                                                                                                       | 1 = 0; 2 = 1-2 friends; 3 = 3-5 friends; 4 = 6-9 friends; 5 = 10 or more friends                                   |
| Psychosocial  | Received emotional support                                                                                                                                                                                                                                                                                                             | 0 = Yes; 1 = No                                                                                                    |
| Psychosocial  | Providing emotional support                                                                                                                                                                                                                                                                                                            | 0 = Yes; 1 = No                                                                                                    |
| Psychosocial  | Received care support                                                                                                                                                                                                                                                                                                                  | 0 = Yes; 1 = No                                                                                                    |
| Psychosocial  | Giving care support                                                                                                                                                                                                                                                                                                                    | 0 = Yes; 1 = No                                                                                                    |
| Psychosocial  | Communication with neighbors                                                                                                                                                                                                                                                                                                           | 1 = Very much; 2 = Moderate; 3 = Minimum; 4 = Not at all                                                           |

|              |                                        |                                                                                                                                                       |
|--------------|----------------------------------------|-------------------------------------------------------------------------------------------------------------------------------------------------------|
| Psychosocial | Count of 6 negative life events        | As continuous                                                                                                                                         |
| Psychosocial | Sense of coherence                     | As continuous                                                                                                                                         |
| Behavioral   | Current smoking status                 | 1 = Never; 2 = Quit; 3 = Smoking                                                                                                                      |
| Behavioral   | Current alcohol drinking               | 1 = Drinking; 2 = Quit; 3 = No drinking                                                                                                               |
| Behavioral   | Frequency of fish and meat consumption | 1 = Twice a day or more often; 2 = once a day; 3 = 4-6 times a week; 4 = 2-3 times a week; 5 = once a week; 6 = less than once a week; 7 = not at all |
| Behavioral   | Eating vegetable or fruit              | 1 = Twice a day or more often; 2 = once a day; 3 = 4-6 times a week; 4 = 2-3 times a week; 5 = once a week; 6 = less than once a week; 7 = not at all |
| Behavioral   | Frequency of going out                 | 1 = Everyday; 2 = 2-3 times a week; 3 = once a week; 4 = 1-2 times a month; 5 = a few times a year; 6 = not at all                                    |
| Behavioral   | Having hobby                           | 1 = Yes; 2 = No                                                                                                                                       |

---

All covariates were measured at the 2010 wave, 7 months prior to the disaster onset. These variables were used as covariates to control for confounding and also to estimate effect heterogeneity.

**Web Table 4. Distributions of the functional limitation outcomes in 2013 and 2016 among the analytic samples (n = 3,350 for 2013 and n = 2,264 for 2016).**

| Outcomes                      | 2013        |              | 2016        |              |
|-------------------------------|-------------|--------------|-------------|--------------|
|                               | Home loss   | No home loss | Home loss   | No home loss |
|                               | Mean (SD)   | Mean (SD)    | Mean (SD)   | Mean (SD)    |
| Certified physical disability | 8.42 (1.46) | 8.73 (0.98)  | 8.35 (1.41) | 8.58 (1.17)  |
| ADL                           | 2.74 (0.59) | 2.90 (0.39)  | 2.64 (0.70) | 2.74 (0.58)  |
| Total IADL                    | 10.1 (3.54) | 11.3 (2.48)  | 10.7 (3.33) | 11.2 (2.53)  |

Abbreviations: ADL, Activity of Daily Living; IADL, Instrumental Activity of Daily Living; SD, standard deviation

IADL was measured by the 13-item Tokyo Metropolitan Institute of Gerontology Index of Competence. IADL scores ranged from 0-13 points, where smaller scores indicate lower functional independence. ADL had three levels (1= support needed completely, 2 = support needed partially, and 3 = no help needed). Levels of certified physical disability ranged from 1 ("Cannot roll over in a bed independently") to 9 ("no physical disability/not requesting care services"), where smaller values indicate greater levels of disability. Thus, lower values for these outcomes indicate greater functional limitation.



**Web Table 5. Estimates of conditional average treatment effects of home loss on functional limitation in 2013 and 2016.<sup>a</sup>**

| Year | Outcome             | Conditional Average Treatment Effects <sup>b</sup> |      |       |      |
|------|---------------------|----------------------------------------------------|------|-------|------|
|      |                     | Mean                                               | SD   | Min   | Max  |
| 2013 | Total IADL          | -0.68                                              | 0.27 | -1.95 | 0.06 |
|      | Physical Disability | -0.20                                              | 0.21 | -1.4  | 0.08 |
|      | ADL                 | -0.10                                              | 0.07 | -0.41 | 0.02 |
| 2016 | Total IADL          | -0.35                                              | 0.41 | -2.49 | 0.37 |
|      | Physical Disability | -0.18                                              | 0.13 | -0.79 | 0.18 |
|      | ADL                 | -0.07                                              | 0.08 | -0.48 | 0.10 |

Abbreviations: ADL, Activity of Daily Living; IADL, Instrumental Activity of Daily Living.

<sup>a</sup> All models were adjusted for the 55 pre-disaster demographic and socioeconomic factors, health conditions, psychosocial variables, and behaviors from the 2010 wave. ADL had three levels (1= support needed completely, 2 = support needed partially, and 3 = no help needed). IADL was measured by the 13-item Tokyo Metropolitan Institute of Gerontology Index of Competence. IADL scores ranged from 0-13 points, where smaller scores indicate lower functional independence. Levels of certified physical disability ranged from 1 ("Cannot roll over in a bed independently") to 9 ("no physical disability/not requesting care services"), where smaller values indicate greater levels of disability. Thus, lower values for these outcomes indicate greater functional limitation.

<sup>b</sup> Heterogeneous effects (i.e., conditional average treatment effects: CATEs) were estimated using generalized random forest algorithm, using the 55 pre-disaster demographic and socioeconomic factors, health conditions, psychosocial variables, and behaviors from the 2010 wave.

**Web Table 6. Evaluation of causal forest fit and test of heterogeneity.<sup>a</sup>**

| Year | Outcome             | Comparison of ATEs among those who were above versus below the median CATE <sup>b</sup> | Best linear predictor analysis <sup>c</sup> |         |                     |                     |
|------|---------------------|-----------------------------------------------------------------------------------------|---------------------------------------------|---------|---------------------|---------------------|
|      |                     |                                                                                         | Mean forest                                 |         | Differential forest |                     |
|      |                     | p for heterogeneity                                                                     | estimate                                    | p-value | estimate            | P for heterogeneity |
| 2013 | Total IADL          | <0.001                                                                                  | 1.04                                        | 0.03    | 1.40                | 0.02                |
|      | Physical Disability | <0.001                                                                                  | 1.11                                        | <0.01   | 1.76                | 0.01                |
|      | ADL                 | <0.001                                                                                  | 1.10                                        | <0.01   | 0.91                | 0.01                |
| 2016 | Total IADL          | <0.001                                                                                  | 1.20                                        | 0.17    | 2.01                | 0.02                |
|      | Physical Disability | <0.001                                                                                  | 1.24                                        | 0.08    | 1.81                | <.001               |
|      | ADL                 | <0.001                                                                                  | 1.28                                        | 0.20    | 1.93                | 0.10                |

Abbreviations: ADL, Activity of Daily Living; IADL, Instrumental Activity of Daily Living

<sup>a</sup> All models were adjusted for the 55 pre-disaster demographic and socioeconomic factors, health conditions, psychosocial variables, and behaviors from the 2010 wave. ADL had three levels (1= support needed completely, 2 = support needed partially, and 3 = no help needed). IADL was measured by the 13-item Tokyo Metropolitan Institute of Gerontology Index of Competence. IADL scores ranged from 0-13 points, where smaller scores indicate lower functional independence. Levels of certified physical disability ranged from 1 ("Cannot roll over in a bed independently") to 9 ("no physical disability/not requesting care services"), where smaller values indicate greater levels of disability. Thus, lower values for these outcomes indicate greater functional limitation. Heterogeneous effects (i.e., conditional average treatment effects: CATEs) were estimated using generalized random forest algorithm, using the 55 pre-disaster demographic and socioeconomic factors, health conditions, psychosocial variables, and behaviors from the 2010 wave.

<sup>b</sup> We estimated average treatment effects among those who were above/below the median CATE. We then computed p-value for the difference between the two estimated average effects as a test for heterogeneity.

<sup>c</sup> Best linear predictor analysis was implemented by using the `test_calibration()` function in the `grf` package. In the BLP analysis, if the coefficient for mean forest is closer to 1, then it indicates that the average forest prediction is correct. If the coefficient for the differential forest prediction is closer to 1, then it indicates the forest prediction adequately captures the underlying heterogeneity. The single-sided test of a coefficient for differential forest >0 is used as an omnibus test for heterogeneity.

**Web Table 7. Pre-disaster characteristics of people at bottom 10% vs. top 10% of the estimated conditional average treatment effect of home loss on certified physical disability level in 2013 and 2016.<sup>a</sup>**

| Baseline Characteristics                            | Year: 2013 (n = 3,350) |                         |                          | Year: 2016 (n = 2,664) |                         |                          |
|-----------------------------------------------------|------------------------|-------------------------|--------------------------|------------------------|-------------------------|--------------------------|
|                                                     | Resilient<br>(n = 340) | Vulnerable<br>(n = 340) | p-<br>value <sup>b</sup> | Resilient<br>(n = 280) | Vulnerable<br>(n = 280) | p-<br>value <sup>b</sup> |
| <b>CATE Estimates, mean (SD)<sup>e</sup></b>        | 0.00 (0.02)            | -0.69 (0.19)            | <0.001                   | -0.01 (0.04)           | -0.43 (0.08)            | <0.001                   |
| <b>Age, mean (SD)</b>                               | 68.64 (2.69)           | 83.08 (5.04)            | <0.001                   | 68.60 (3.14)           | 79.98 (3.41)            | <0.001                   |
| <b>Gender, n (%)</b>                                |                        |                         | <0.001                   |                        |                         | <0.001                   |
| Men                                                 | 121 (36%)              | 229 (67%)               |                          | 109 (39%)              | 179 (64%)               |                          |
| Women                                               | 219 (64%)              | 111 (33%)               |                          | 171 (61%)              | 101 (36%)               |                          |
| <b>Marital status, n (%)</b>                        |                        |                         | <0.001                   |                        |                         | <0.001                   |
| Married                                             | 334 (98%)              | 148 (44%)               |                          | 244 (87%)              | 178 (64%)               |                          |
| Widowed                                             | 6 (1.8%)               | 180 (53%)               |                          | 27 (9.6%)              | 93 (33%)                |                          |
| Divorced                                            | 0 (0%)                 | 3 (0.9%)                |                          | 7 (2.5%)               | 5 (1.8%)                |                          |
| Single                                              | 0 (0%)                 | 7 (2.1%)                |                          | 1 (0.4%)               | 3 (1.1%)                |                          |
| Others                                              | 0 (0%)                 | 2 (0.6%)                |                          | 1 (0.4%)               | 1 (0.4%)                |                          |
| <b>Living alone, n (%)</b>                          |                        |                         | <0.001                   |                        |                         | 0.2                      |
| No                                                  | 337 (99%)              | 306 (90%)               |                          | 266 (95%)              | 257 (92%)               |                          |
| Yes                                                 | 3 (0.9%)               | 34 (10%)                |                          | 14 (5.0%)              | 23 (8.2%)               |                          |
| <b>Education, n (%)</b>                             |                        |                         | <0.001                   |                        |                         | <0.001                   |
| Less than 6 years                                   | 1 (0.3%)               | 17 (5.0%)               |                          | 1 (0.4%)               | 3 (1.1%)                |                          |
| 6-9 years                                           | 74 (22%)               | 175 (51%)               |                          | 60 (21%)               | 113 (40%)               |                          |
| 10-12 years                                         | 174 (51%)              | 114 (34%)               |                          | 148 (53%)              | 105 (38%)               |                          |
| 13 years or more                                    | 86 (25%)               | 29 (8.5%)               |                          | 71 (25%)               | 55 (20%)                |                          |
| Others                                              | 5 (1.5%)               | 5 (1.5%)                |                          | 0 (0%)                 | 4 (1.4%)                |                          |
| <b>Job, n (%)</b>                                   |                        |                         | <0.001                   |                        |                         | <0.001                   |
| Working                                             | 100 (29%)              | 17 (5.0%)               |                          | 90 (32%)               | 15 (5.4%)               |                          |
| Retired                                             | 216 (64%)              | 174 (51%)               |                          | 173 (62%)              | 177 (63%)               |                          |
| Never worked                                        | 24 (7.1%)              | 149 (44%)               |                          | 17 (6.1%)              | 88 (31%)                |                          |
| <b>Household income, mean (SD)</b>                  | 234.45 (141.51)        | 231.60 (125.21)         | 0.4                      | 284.21 (129.83)        | 242.74 (107.89)         | <0.001                   |
| <b>Depressive symptoms, n (%)</b>                   |                        |                         | <0.001                   |                        |                         | <0.001                   |
| Mild/severe depressive symptoms                     | 61 (18%)               | 128 (38%)               |                          | 22 (7.9%)              | 94 (34%)                |                          |
| No depressive symptoms                              | 279 (82%)              | 212 (62%)               |                          | 258 (92%)              | 186 (66%)               |                          |
| <b>Self-rated health, n (%)</b>                     |                        |                         | <0.001                   |                        |                         | <0.001                   |
| Very good                                           | 63 (19%)               | 23 (6.8%)               |                          | 55 (20%)               | 28 (10%)                |                          |
| Good                                                | 260 (76%)              | 212 (62%)               |                          | 215 (77%)              | 196 (70%)               |                          |
| Not good                                            | 17 (5.0%)              | 85 (25%)                |                          | 8 (2.9%)               | 49 (18%)                |                          |
| Bad                                                 | 0 (0%)                 | 20 (5.9%)               |                          | 2 (0.7%)               | 7 (2.5%)                |                          |
| <b>Body mass index, mean (SD)</b>                   | 25.58 (2.51)           | 22.79 (3.15)            | <0.001                   | 24.40 (2.84)           | 22.69 (2.43)            | <0.001                   |
| <b>Total IADL, mean (SD)</b>                        | 12.48 (0.78)           | 9.60 (3.32)             | <0.001                   | 12.18 (1.40)           | 12.30 (1.06)            | 0.8                      |
| <b>Instrumental IADL, mean (SD)<sup>e</sup></b>     | 4.96 (0.20)            | 3.82 (1.50)             | <0.001                   | 4.66 (0.78)            | 4.94 (0.27)             | <0.001                   |
| <b>Intellectual IADL, mean (SD)<sup>e</sup></b>     | 3.80 (0.45)            | 3.02 (1.18)             | <0.001                   | 3.87 (0.46)            | 3.79 (0.47)             | 0.001                    |
| <b>Social IADL, mean (SD)<sup>e</sup></b>           | 3.73 (0.53)            | 2.76 (1.36)             | <0.001                   | 3.65 (0.63)            | 3.58 (0.82)             | 0.7                      |
| <b>ADL, mean (SD)</b>                               | 3.00 (0.05)            | 2.93 (0.33)             | <0.001                   | 2.99 (0.08)            | 3.00 (0.06)             | 0.6                      |
| <b># of Treatment for major diseases, mean (SD)</b> | 1.02 (1.02)            | 2.07 (1.60)             | <0.001                   | 1.16 (1.04)            | 1.70 (1.37)             | <0.001                   |
| <b>Trust in local people, n (%)</b>                 |                        |                         | <0.001                   |                        |                         | <0.001                   |
| Very much                                           | 25 (7.4%)              | 71 (21%)                |                          | 33 (12%)               | 47 (17%)                |                          |
| Moderate                                            | 245 (72%)              | 171 (50%)               |                          | 204 (73%)              | 156 (56%)               |                          |
| Neutral                                             | 66 (19%)               | 82 (24%)                |                          | 41 (15%)               | 71 (25%)                |                          |

|                                                         |             |             |        |             |             |        |
|---------------------------------------------------------|-------------|-------------|--------|-------------|-------------|--------|
| Not very much                                           | 4 (1.2%)    | 14 (4.1%)   |        | 2 (0.7%)    | 2 (0.7%)    |        |
| Not at all                                              | 0 (0%)      | 2 (0.6%)    |        | 0 (0%)      | 4 (1.4%)    |        |
| <b>Mutual help in community, n (%)</b>                  |             |             | <0.001 |             |             | <0.001 |
| Very much                                               | 16 (4.7%)   | 48 (14%)    |        | 14 (5.0%)   | 36 (13%)    |        |
| Moderate                                                | 201 (59%)   | 167 (49%)   |        | 187 (67%)   | 140 (50%)   |        |
| Neutral                                                 | 108 (32%)   | 90 (26%)    |        | 70 (25%)    | 82 (29%)    |        |
| Not very much                                           | 12 (3.5%)   | 25 (7.4%)   |        | 7 (2.5%)    | 20 (7.1%)   |        |
| Not at all                                              | 3 (0.9%)    | 10 (2.9%)   |        | 2 (0.7%)    | 2 (0.7%)    |        |
| <b>Attachment to community, n (%)</b>                   |             |             | <0.001 |             |             | 0.021  |
| Very much                                               | 79 (23%)    | 122 (36%)   |        | 73 (26%)    | 103 (37%)   |        |
| Moderate                                                | 208 (61%)   | 150 (44%)   |        | 172 (61%)   | 136 (49%)   |        |
| Neutral                                                 | 38 (11%)    | 44 (13%)    |        | 26 (9.3%)   | 26 (9.3%)   |        |
| Not very much                                           | 14 (4.1%)   | 18 (5.3%)   |        | 8 (2.9%)    | 13 (4.6%)   |        |
| Not at all                                              | 1 (0.3%)    | 6 (1.8%)    |        | 1 (0.4%)    | 2 (0.7%)    |        |
| <b>Participation in sport clubs, n (%)</b>              |             |             | <0.001 |             |             | 0.008  |
| Everyday                                                | 2 (0.6%)    | 1 (0.3%)    |        | 4 (1.4%)    | 2 (0.7%)    |        |
| A few times a week                                      | 34 (10%)    | 16 (4.7%)   |        | 19 (6.8%)   | 44 (16%)    |        |
| Once a week                                             | 40 (12%)    | 13 (3.8%)   |        | 23 (8.2%)   | 26 (9.3%)   |        |
| 1-2 times a month                                       | 25 (7.4%)   | 9 (2.6%)    |        | 19 (6.8%)   | 9 (3.2%)    |        |
| A few times a year                                      | 25 (7.4%)   | 6 (1.8%)    |        | 12 (4.3%)   | 13 (4.6%)   |        |
| Not at all                                              | 214 (63%)   | 295 (87%)   |        | 203 (72%)   | 186 (66%)   |        |
| <b>Participation in hobby clubs, n (%)</b>              |             |             | <0.001 |             |             | <0.001 |
| Everyday                                                | 2 (0.6%)    | 0 (0%)      |        | 4 (1.4%)    | 1 (0.4%)    |        |
| A few times a week                                      | 31 (9.1%)   | 24 (7.1%)   |        | 11 (3.9%)   | 45 (16%)    |        |
| Once a week                                             | 46 (14%)    | 23 (6.8%)   |        | 24 (8.6%)   | 43 (15%)    |        |
| 1-2 times a month                                       | 56 (16%)    | 30 (8.8%)   |        | 43 (15%)    | 65 (23%)    |        |
| A few times a year                                      | 60 (18%)    | 12 (3.5%)   |        | 39 (14%)    | 22 (7.9%)   |        |
| Not at all                                              | 145 (43%)   | 251 (74%)   |        | 159 (57%)   | 104 (37%)   |        |
| <b>Frequency of meeting friends, n (%)</b>              |             |             | <0.001 |             |             | <0.001 |
| Every day                                               | 25 (7.4%)   | 46 (14%)    |        | 13 (4.6%)   | 45 (16%)    |        |
| 2-3 times a week                                        | 83 (24%)    | 64 (19%)    |        | 41 (15%)    | 76 (27%)    |        |
| Once a week                                             | 64 (19%)    | 55 (16%)    |        | 51 (18%)    | 65 (23%)    |        |
| 1-2 times a month                                       | 96 (28%)    | 62 (18%)    |        | 91 (32%)    | 58 (21%)    |        |
| A few times a year                                      | 70 (21%)    | 49 (14%)    |        | 66 (24%)    | 32 (11%)    |        |
| Not at all                                              | 2 (0.6%)    | 64 (19%)    |        | 18 (6.4%)   | 4 (1.4%)    |        |
| <b># of friends interacted last month, n (%)</b>        |             |             | <0.001 |             |             | <0.001 |
| 0                                                       | 8 (2.4%)    | 50 (15%)    |        | 15 (5.4%)   | 8 (2.9%)    |        |
| 1-2 friends                                             | 35 (10%)    | 92 (27%)    |        | 57 (20%)    | 30 (11%)    |        |
| 3-5 friends                                             | 84 (25%)    | 85 (25%)    |        | 96 (34%)    | 75 (27%)    |        |
| 6-9 friends                                             | 57 (17%)    | 32 (9.4%)   |        | 36 (13%)    | 50 (18%)    |        |
| 10 or more friends                                      | 156 (46%)   | 81 (24%)    |        | 76 (27%)    | 117 (42%)   |        |
| <b>Received emotional social support, n (%)</b>         |             |             | <0.001 |             |             | >0.9   |
| 10 (2.9%)                                               | 36 (11%)    |             |        | 7 (2.5%)    | 7 (2.5%)    |        |
| <b>Provision of emotional support, n (%)</b>            |             |             | <0.001 |             |             | 0.073  |
| 3 (0.9%)                                                | 62 (18%)    |             |        | 6 (2.1%)    | 15 (5.4%)   |        |
| <b>Received care support, n (%)</b>                     |             |             | 0.2    |             |             | 0.2    |
| 6 (1.8%)                                                | 12 (3.5%)   |             |        | 7 (2.5%)    | 2 (0.7%)    |        |
| <b>Provision of care support, n (%)</b>                 |             |             | <0.001 |             |             | 0.002  |
| 5 (1.5%)                                                | 106 (31%)   |             |        | 12 (4.3%)   | 33 (12%)    |        |
| <b>Communication with neighbors, n (%)</b>              |             |             | 0.2    |             |             | <0.001 |
| Very much                                               | 84 (25%)    | 78 (23%)    |        | 32 (11%)    | 87 (31%)    |        |
| Moderate                                                | 193 (57%)   | 176 (52%)   |        | 197 (70%)   | 153 (55%)   |        |
| Minimum                                                 | 60 (18%)    | 79 (23%)    |        | 51 (18%)    | 39 (14%)    |        |
| Not at all                                              | 3 (0.9%)    | 7 (2.1%)    |        | 0 (0%)      | 1 (0.4%)    |        |
| <b># of negative events in the past year, mean (SD)</b> |             |             | 0.042  |             |             | <0.001 |
|                                                         | 0.54 (0.73) | 0.64 (0.72) |        | 0.46 (0.62) | 0.68 (0.75) |        |

|                                                             |              |              |        |              |              |        |
|-------------------------------------------------------------|--------------|--------------|--------|--------------|--------------|--------|
| <b>Sense of coherence, mean (SD)</b>                        | 23.54 (3.60) | 21.84 (4.21) | <0.001 | 24.00 (2.99) | 21.82 (4.26) | <0.001 |
| <b>Current smoking status, n (%)</b>                        |              |              | <0.001 |              |              | <0.001 |
| Never                                                       | 157 (46%)    | 244 (72%)    |        | 143 (51%)    | 198 (71%)    |        |
| Quit                                                        | 121 (36%)    | 76 (22%)     |        | 96 (34%)     | 64 (23%)     |        |
| Smoking                                                     | 62 (18%)     | 20 (5.9%)    |        | 41 (15%)     | 18 (6.4%)    |        |
| <b>Current alcohol drinking, n (%)</b>                      |              |              | <0.001 |              |              | <0.001 |
| Drinking                                                    | 225 (66%)    | 74 (22%)     |        | 187 (67%)    | 56 (20%)     |        |
| Quit                                                        | 8 (2.4%)     | 13 (3.8%)    |        | 6 (2.1%)     | 9 (3.2%)     |        |
| Never                                                       | 107 (31%)    | 253 (74%)    |        | 87 (31%)     | 215 (77%)    |        |
| <b>Frequency of fish and meat consumption, n (%)</b>        |              |              | 0.5    |              |              | 0.2    |
| Twice a day or more often                                   | 45 (13%)     | 45 (13%)     |        | 29 (10%)     | 39 (14%)     |        |
| Once a day                                                  | 130 (38%)    | 138 (41%)    |        | 145 (52%)    | 124 (44%)    |        |
| 4-6 times a week                                            | 82 (24%)     | 64 (19%)     |        | 62 (22%)     | 56 (20%)     |        |
| 2-3 times a week                                            | 69 (20%)     | 76 (22%)     |        | 41 (15%)     | 56 (20%)     |        |
| Once a week                                                 | 10 (2.9%)    | 10 (2.9%)    |        | 3 (1.1%)     | 3 (1.1%)     |        |
| Less than once a week                                       | 4 (1.2%)     | 4 (1.2%)     |        | 0 (0%)       | 2 (0.7%)     |        |
| Not at all                                                  | 0 (0%)       | 3 (0.9%)     |        |              |              |        |
| <b>Frequency of fruits and vegetable consumption, n (%)</b> |              |              | 0.049  |              |              | 0.4    |
| Twice a day or more often                                   | 185 (54%)    | 187 (55%)    |        | 166 (59%)    | 175 (62%)    |        |
| Once a day                                                  | 100 (29%)    | 101 (30%)    |        | 84 (30%)     | 80 (29%)     |        |
| 4-6 times a week                                            | 42 (12%)     | 25 (7.4%)    |        | 25 (8.9%)    | 16 (5.7%)    |        |
| 2-3 times a week                                            | 10 (2.9%)    | 22 (6.5%)    |        | 5 (1.8%)     | 8 (2.9%)     |        |
| Once a week                                                 | 2 (0.6%)     | 1 (0.3%)     |        |              |              |        |
| Less than once a week                                       | 0 (0%)       | 2 (0.6%)     |        | 0 (0%)       | 1 (0.4%)     |        |
| Not at all                                                  | 1 (0.3%)     | 2 (0.6%)     |        |              |              |        |
| <b>Frequency of going out, n (%)</b>                        |              |              | <0.001 |              |              | <0.001 |
| Every day                                                   | 230 (68%)    | 90 (26%)     |        | 176 (63%)    | 127 (45%)    |        |
| 2-3 times a week                                            | 96 (28%)     | 104 (31%)    |        | 88 (31%)     | 98 (35%)     |        |
| Once a week                                                 | 14 (4.1%)    | 52 (15%)     |        | 8 (2.9%)     | 41 (15%)     |        |
| 1-2 times a month                                           | 0 (0%)       | 50 (15%)     |        | 7 (2.5%)     | 10 (3.6%)    |        |
| A few times a year                                          | 0 (0%)       | 16 (4.7%)    |        | 1 (0.4%)     | 3 (1.1%)     |        |
| Not at all                                                  | 0 (0%)       | 28 (8.2%)    |        | 0 (0%)       | 1 (0.4%)     |        |
| <b>Having hobby, n (%)</b>                                  |              |              | <0.001 |              |              | <0.001 |
| Yes                                                         | 232 (68%)    | 146 (43%)    |        | 165 (59%)    | 222 (79%)    |        |
| No                                                          | 108 (32%)    | 194 (57%)    |        | 115 (41%)    | 58 (21%)     |        |

Abbreviations: ADL, Activity of Daily Living; CATE, Conditional average treatment effect; IADL, Instrumental Activity of Daily Living

<sup>a</sup> Heterogeneous effects (i.e., conditional average treatment effects: CATEs) were estimated via the generalized random forest algorithm, using the 55 pre-disaster demographic and socioeconomic factors, health conditions, psychosocial variables, and behaviors from the 2010 wave. Levels of certified physical disability ranged from 1 ("Cannot roll over in a bed independently") to 9 ("no physical disability/not requesting care services"), where smaller values indicate greater levels of disability. Thus, decrease in this outcome indicate increased functional limitation. Top 10 % of the distributions of CATEs were labeled as a "Resilient" group because they showed weaker associations between home loss and decreased outcome. Bottom 10 % of the distributions of CATEs were labeled as a "Vulnerable" group because they showed greater associations between home loss and decreased outcome.

<sup>b</sup> P-values for between-group differences. We used Wilcoxon rank sum test for continuous variables and Fisher's exact test for categorical variables.

**Web Table 8. Pre-disaster characteristics of people at bottom 10% vs. top 10% of the estimated conditional average treatment effect of home loss on total instrumental activities of daily living scores in 2013 and 2016.<sup>a</sup>**

| Baseline Characteristics                            | Year: 2013 (n = 3,350) |                         |                          | Year: 2016 (n = 2,664) |                         |                          |
|-----------------------------------------------------|------------------------|-------------------------|--------------------------|------------------------|-------------------------|--------------------------|
|                                                     | Resilient<br>(n = 340) | Vulnerable<br>(n = 340) | p-<br>value <sup>b</sup> | Resilient<br>(n = 280) | Vulnerable<br>(n = 280) | p-<br>value <sup>b</sup> |
| <b>CATE Estimates, mean (SD)<sup>e</sup></b>        | -0.32 (0.08)           | -1.20 (0.19)            | <0.001                   | 0.17 (0.07)            | -1.16 (0.27)            | <0.001                   |
| <b>Age, mean (SD)</b>                               | 68.86 (3.17)           | 81.39 (4.87)            | <0.001                   | 69.34 (2.97)           | 79.50 (4.68)            | <0.001                   |
| <b>Gender, n (%)</b>                                |                        |                         | <0.001                   |                        |                         | <0.001                   |
| Men                                                 | 131 (39%)              | 206 (61%)               |                          | 118 (42%)              | 190 (68%)               |                          |
| Women                                               | 209 (61%)              | 134 (39%)               |                          | 162 (58%)              | 90 (32%)                |                          |
| <b>Marital status, n (%)</b>                        |                        |                         | <0.001                   |                        |                         | <0.001                   |
| Married                                             | 330 (97%)              | 154 (45%)               |                          | 260 (93%)              | 146 (52%)               |                          |
| Widowed                                             | 6 (1.8%)               | 173 (51%)               |                          | 15 (5.4%)              | 122 (44%)               |                          |
| Divorced                                            | 4 (1.2%)               | 6 (1.8%)                |                          | 4 (1.4%)               | 5 (1.8%)                |                          |
| Single                                              | 0 (0%)                 | 6 (1.8%)                |                          | 0 (0%)                 | 5 (1.8%)                |                          |
| Others                                              | 0 (0%)                 | 1 (0.3%)                |                          | 1 (0.4%)               | 2 (0.7%)                |                          |
| <b>Living alone, n (%)</b>                          |                        |                         | <0.001                   |                        |                         | <0.001                   |
| No                                                  | 332 (98%)              | 299 (88%)               |                          | 271 (97%)              | 238 (85%)               |                          |
| Yes                                                 | 8 (2.4%)               | 41 (12%)                |                          | 9 (3.2%)               | 42 (15%)                |                          |
| <b>Education, n (%)</b>                             |                        |                         | <0.001                   |                        |                         | 0.001                    |
| Less than 6 years                                   | 1 (0.3%)               | 9 (2.6%)                |                          | 1 (0.4%)               | 5 (1.8%)                |                          |
| 6-9 years                                           | 73 (21%)               | 140 (41%)               |                          | 64 (23%)               | 102 (36%)               |                          |
| 10-12 years                                         | 179 (53%)              | 131 (39%)               |                          | 152 (54%)              | 125 (45%)               |                          |
| 13 years or more                                    | 84 (25%)               | 54 (16%)                |                          | 61 (22%)               | 46 (16%)                |                          |
| Others                                              | 3 (0.9%)               | 6 (1.8%)                |                          | 2 (0.7%)               | 2 (0.7%)                |                          |
| <b>Job, n (%)</b>                                   |                        |                         | <0.001                   |                        |                         | <0.001                   |
| Working                                             | 94 (28%)               | 25 (7.4%)               |                          | 82 (29%)               | 16 (5.7%)               |                          |
| Retired                                             | 217 (64%)              | 192 (56%)               |                          | 177 (63%)              | 184 (66%)               |                          |
| Never worked                                        | 29 (8.5%)              | 123 (36%)               |                          | 21 (7.5%)              | 80 (29%)                |                          |
| <b>Household income, mean (SD)</b>                  | 233.85 (139.35)        | 254.94 (118.20)         | <0.001                   | 233.32 (147.77)        | 254.00 (117.63)         | 0.002                    |
| <b>Depressive symptoms, n (%)</b>                   |                        |                         | <0.001                   |                        |                         | <0.001                   |
| Mild/severe depressive symptoms                     | 48 (14%)               | 106 (31%)               |                          | 24 (8.6%)              | 104 (37%)               |                          |
| No depressive symptoms                              | 292 (86%)              | 234 (69%)               |                          | 256 (91%)              | 176 (63%)               |                          |
| <b>Self-rated health, n (%)</b>                     |                        |                         | <0.001                   |                        |                         | <0.001                   |
| Very good                                           | 71 (21%)               | 30 (8.8%)               |                          | 14 (5.0%)              | 34 (12%)                |                          |
| Good                                                | 249 (73%)              | 241 (71%)               |                          | 234 (84%)              | 197 (70%)               |                          |
| Not good                                            | 18 (5.3%)              | 60 (18%)                |                          | 30 (11%)               | 39 (14%)                |                          |
| Bad                                                 | 2 (0.6%)               | 9 (2.6%)                |                          | 2 (0.7%)               | 10 (3.6%)               |                          |
| <b>Body mass index, mean (SD)</b>                   | 25.55 (2.75)           | 22.16 (2.60)            | <0.001                   | 25.29 (2.79)           | 22.76 (2.31)            | <0.001                   |
| <b>Total IADL, mean (SD)</b>                        | 11.57 (1.62)           | 11.95 (1.61)            | <0.001                   | 12.07 (1.23)           | 12.01 (1.69)            | 0.2                      |
| <b>Instrumental IADL, mean (SD)<sup>e</sup></b>     | 4.78 (0.57)            | 4.72 (0.69)             | 0.056                    | 4.89 (0.39)            | 4.75 (0.67)             | 0.003                    |
| <b>Intellectual IADL, mean (SD)<sup>e</sup></b>     | 3.43 (0.76)            | 3.75 (0.60)             | <0.001                   | 3.60 (0.67)            | 3.76 (0.59)             | <0.001                   |
| <b>Social IADL, mean (SD)<sup>e</sup></b>           | 3.34 (0.91)            | 3.50 (0.82)             | 0.053                    | 3.58 (0.70)            | 3.52 (0.93)             | >0.9                     |
| <b>ADL, mean (SD)</b>                               | 3.00 (0.05)            | 2.99 (0.13)             | 0.3                      | 3.00 (0.06)            | 3.00 (0.00)             | 0.3                      |
| <b># of Treatment for major diseases, mean (SD)</b> | 0.99 (1.01)            | 1.74 (1.36)             | <0.001                   | 1.30 (1.21)            | 1.76 (1.45)             | <0.001                   |
| <b>Trust in local people, n (%)</b>                 |                        |                         | <0.001                   |                        |                         | <0.001                   |
| Very much                                           | 42 (12%)               | 55 (16%)                |                          | 26 (9.3%)              | 48 (17%)                |                          |
| Moderate                                            | 223 (66%)              | 198 (58%)               |                          | 224 (80%)              | 140 (50%)               |                          |
| Neutral                                             | 53 (16%)               | 82 (24%)                |                          | 29 (10%)               | 76 (27%)                |                          |

|                                                         |             |             |        |             |             |        |
|---------------------------------------------------------|-------------|-------------|--------|-------------|-------------|--------|
| Not very much                                           | 22 (6.5%)   | 5 (1.5%)    |        | 0 (0%)      | 12 (4.3%)   |        |
| Not at all                                              |             |             |        | 1 (0.4%)    | 4 (1.4%)    |        |
| <b>Mutual help in community, n (%)</b>                  |             |             | 0.018  |             |             | <0.001 |
| Very much                                               | 17 (5.0%)   | 34 (10%)    |        | 13 (4.6%)   | 36 (13%)    |        |
| Moderate                                                | 198 (58%)   | 203 (60%)   |        | 219 (78%)   | 134 (48%)   |        |
| Neutral                                                 | 97 (29%)    | 88 (26%)    |        | 42 (15%)    | 83 (30%)    |        |
| Not very much                                           | 25 (7.4%)   | 15 (4.4%)   |        | 6 (2.1%)    | 20 (7.1%)   |        |
| Not at all                                              | 3 (0.9%)    | 0 (0%)      |        | 0 (0%)      | 7 (2.5%)    |        |
| <b>Attachment to community, n (%)</b>                   |             |             | 0.2    |             |             | <0.001 |
| Very much                                               | 96 (28%)    | 108 (32%)   |        | 65 (23%)    | 106 (38%)   |        |
| Moderate                                                | 187 (55%)   | 187 (55%)   |        | 190 (68%)   | 128 (46%)   |        |
| Neutral                                                 | 49 (14%)    | 33 (9.7%)   |        | 21 (7.5%)   | 29 (10%)    |        |
| Not very much                                           | 8 (2.4%)    | 11 (3.2%)   |        | 4 (1.4%)    | 14 (5.0%)   |        |
| Not at all                                              | 0 (0%)      | 1 (0.3%)    |        | 0 (0%)      | 3 (1.1%)    |        |
| <b>Participation in sport clubs, n (%)</b>              |             |             | 0.03   |             |             | 0.11   |
| Everyday                                                | 2 (0.6%)    | 1 (0.3%)    |        | 3 (1.1%)    | 2 (0.7%)    |        |
| A few times a week                                      | 31 (9.1%)   | 30 (8.8%)   |        | 18 (6.4%)   | 36 (13%)    |        |
| Once a week                                             | 35 (10%)    | 20 (5.9%)   |        | 25 (8.9%)   | 25 (8.9%)   |        |
| 1-2 times a month                                       | 27 (7.9%)   | 15 (4.4%)   |        | 15 (5.4%)   | 9 (3.2%)    |        |
| A few times a year                                      | 23 (6.8%)   | 16 (4.7%)   |        | 16 (5.7%)   | 11 (3.9%)   |        |
| Not at all                                              | 222 (65%)   | 258 (76%)   |        | 203 (72%)   | 197 (70%)   |        |
| <b>Participation in hobby clubs, n (%)</b>              |             |             | 0.051  |             |             | <0.001 |
| Everyday                                                | 5 (1.5%)    | 2 (0.6%)    |        | 1 (0.4%)    | 2 (0.7%)    |        |
| A few times a week                                      | 30 (8.8%)   | 30 (8.8%)   |        | 17 (6.1%)   | 45 (16%)    |        |
| Once a week                                             | 44 (13%)    | 32 (9.4%)   |        | 34 (12%)    | 35 (12%)    |        |
| 1-2 times a month                                       | 61 (18%)    | 52 (15%)    |        | 45 (16%)    | 58 (21%)    |        |
| A few times a year                                      | 39 (11%)    | 25 (7.4%)   |        | 38 (14%)    | 16 (5.7%)   |        |
| Not at all                                              | 161 (47%)   | 199 (59%)   |        | 145 (52%)   | 124 (44%)   |        |
| <b>Frequency of meeting friends, n (%)</b>              |             |             | <0.001 |             |             | <0.001 |
| Every day                                               | 29 (8.5%)   | 52 (15%)    |        | 1 (0.4%)    | 54 (19%)    |        |
| 2-3 times a week                                        | 66 (19%)    | 73 (21%)    |        | 57 (20%)    | 75 (27%)    |        |
| Once a week                                             | 50 (15%)    | 69 (20%)    |        | 58 (21%)    | 55 (20%)    |        |
| 1-2 times a month                                       | 81 (24%)    | 83 (24%)    |        | 73 (26%)    | 53 (19%)    |        |
| A few times a year                                      | 80 (24%)    | 52 (15%)    |        | 76 (27%)    | 28 (10%)    |        |
| Not at all                                              | 34 (10%)    | 11 (3.2%)   |        | 15 (5.4%)   | 15 (5.4%)   |        |
| <b># of friends interacted last month, n (%)</b>        |             |             | <0.001 |             |             | <0.001 |
| 0                                                       | 30 (8.8%)   | 11 (3.2%)   |        | 11 (3.9%)   | 11 (3.9%)   |        |
| 1-2 friends                                             | 59 (17%)    | 61 (18%)    |        | 64 (23%)    | 28 (10%)    |        |
| 3-5 friends                                             | 78 (23%)    | 112 (33%)   |        | 81 (29%)    | 84 (30%)    |        |
| 6-9 friends                                             | 38 (11%)    | 51 (15%)    |        | 37 (13%)    | 41 (15%)    |        |
| 10 or more friends                                      | 135 (40%)   | 105 (31%)   |        | 87 (31%)    | 116 (41%)   |        |
| <b>Received emotional social support, n (%)</b>         |             |             | 0.8    |             |             | 0.8    |
|                                                         | 13 (3.8%)   | 15 (4.4%)   |        | 7 (2.5%)    | 9 (3.2%)    |        |
| <b>Provision of emotional support, n (%)</b>            |             |             | 0.011  |             |             | 0.003  |
|                                                         | 11 (3.2%)   | 27 (7.9%)   |        | 5 (1.8%)    | 20 (7.1%)   |        |
| <b>Received care support, n (%)</b>                     |             |             | 0.8    |             |             | 0.8    |
|                                                         | 7 (2.1%)    | 5 (1.5%)    |        | 7 (2.5%)    | 5 (1.8%)    |        |
| <b>Provision of care support, n (%)</b>                 |             |             | <0.001 |             |             | <0.001 |
|                                                         | 13 (3.8%)   | 65 (19%)    |        | 9 (3.2%)    | 45 (16%)    |        |
| <b>Communication with neighbors, n (%)</b>              |             |             | 0.008  |             |             | <0.001 |
| Very much                                               | 59 (17%)    | 89 (26%)    |        | 44 (16%)    | 87 (31%)    |        |
| Moderate                                                | 209 (61%)   | 198 (58%)   |        | 191 (68%)   | 154 (55%)   |        |
| Minimum                                                 | 71 (21%)    | 50 (15%)    |        | 44 (16%)    | 38 (14%)    |        |
| Not at all                                              | 1 (0.3%)    | 3 (0.9%)    |        | 1 (0.4%)    | 1 (0.4%)    |        |
| <b># of negative events in the past year, mean (SD)</b> |             |             | <0.001 |             |             | <0.001 |
|                                                         | 0.46 (0.64) | 0.70 (0.76) |        | 0.43 (0.55) | 0.67 (0.75) |        |

|                                                             |              |              |        |              |              |        |
|-------------------------------------------------------------|--------------|--------------|--------|--------------|--------------|--------|
| <b>Sense of coherence, mean (SD)</b>                        | 24.34 (2.72) | 21.26 (4.55) | <0.001 | 23.72 (2.50) | 20.39 (4.89) | <0.001 |
| <b>Current smoking status, n (%)</b>                        |              |              | <0.001 |              |              | <0.001 |
| Never                                                       | 162 (48%)    | 230 (68%)    |        | 139 (50%)    | 211 (75%)    |        |
| Quit                                                        | 124 (36%)    | 91 (27%)     |        | 105 (38%)    | 55 (20%)     |        |
| Smoking                                                     | 54 (16%)     | 19 (5.6%)    |        | 36 (13%)     | 14 (5.0%)    |        |
| <b>Current alcohol drinking, n (%)</b>                      |              |              | <0.001 |              |              | <0.001 |
| Drinking                                                    | 199 (59%)    | 86 (25%)     |        | 157 (56%)    | 61 (22%)     |        |
| Quit                                                        | 6 (1.8%)     | 14 (4.1%)    |        | 5 (1.8%)     | 9 (3.2%)     |        |
| Never                                                       | 135 (40%)    | 240 (71%)    |        | 118 (42%)    | 210 (75%)    |        |
| <b>Frequency of fish and meat consumption, n (%)</b>        |              |              | 0.007  |              |              | 0.037  |
| Twice a day or more often                                   | 35 (10%)     | 44 (13%)     |        | 21 (7.5%)    | 38 (14%)     |        |
| Once a day                                                  | 121 (36%)    | 150 (44%)    |        | 114 (41%)    | 117 (42%)    |        |
| 4-6 times a week                                            | 71 (21%)     | 73 (21%)     |        | 53 (19%)     | 62 (22%)     |        |
| 2-3 times a week                                            | 94 (28%)     | 67 (20%)     |        | 78 (28%)     | 55 (20%)     |        |
| Once a week                                                 | 16 (4.7%)    | 5 (1.5%)     |        | 12 (4.3%)    | 7 (2.5%)     |        |
| Less than once a week                                       | 3 (0.9%)     | 1 (0.3%)     |        | 2 (0.7%)     | 1 (0.4%)     |        |
| Not at all                                                  | 0 (0%)       | 0 (0%)       |        | 0 (0%)       | 0 (0%)       |        |
| <b>Frequency of fruits and vegetable consumption, n (%)</b> |              |              | 0.001  |              |              | <0.001 |
| Twice a day or more often                                   | 170 (50%)    | 196 (58%)    |        | 139 (50%)    | 177 (63%)    |        |
| Once a day                                                  | 92 (27%)     | 105 (31%)    |        | 91 (32%)     | 83 (30%)     |        |
| 4-6 times a week                                            | 52 (15%)     | 25 (7.4%)    |        | 38 (14%)     | 11 (3.9%)    |        |
| 2-3 times a week                                            | 23 (6.8%)    | 14 (4.1%)    |        | 12 (4.3%)    | 9 (3.2%)     |        |
| Once a week                                                 | 3 (0.9%)     | 0 (0%)       |        | 0 (0%)       | 0 (0%)       |        |
| Less than once a week                                       | 0 (0%)       | 0 (0%)       |        | 0 (0%)       | 0 (0%)       |        |
| Not at all                                                  | 0 (0%)       | 0 (0%)       |        | 0 (0%)       | 0 (0%)       |        |
| <b>Frequency of going out, n (%)</b>                        |              |              | <0.001 |              |              | <0.001 |
| Every day                                                   | 217 (64%)    | 129 (38%)    |        | 167 (60%)    | 111 (40%)    |        |
| 2-3 times a week                                            | 97 (29%)     | 119 (35%)    |        | 91 (32%)     | 113 (40%)    |        |
| Once a week                                                 | 12 (3.5%)    | 59 (17%)     |        | 14 (5.0%)    | 33 (12%)     |        |
| 1-2 times a month                                           | 8 (2.4%)     | 24 (7.1%)    |        | 6 (2.1%)     | 15 (5.4%)    |        |
| A few times a year                                          | 5 (1.5%)     | 4 (1.2%)     |        | 2 (0.7%)     | 4 (1.4%)     |        |
| Not at all                                                  | 1 (0.3%)     | 5 (1.5%)     |        | 0 (0%)       | 4 (1.4%)     |        |
| <b>Having hobby, n (%)</b>                                  |              |              | 0.038  |              |              | 0.009  |
| Yes                                                         | 230 (68%)    | 203 (60%)    |        | 173 (62%)    | 203 (72%)    |        |
| No                                                          | 110 (32%)    | 137 (40%)    |        | 107 (38%)    | 77 (28%)     |        |

Abbreviations: ADL, Activity of Daily Living; CATE, Conditional average treatment effect; IADL, Instrumental Activity of Daily Living

<sup>a</sup> Heterogeneous effects (i.e., conditional average treatment effects: CATEs) were estimated via the generalized random forest algorithm, using the 55 pre-disaster demographic and socioeconomic factors, health conditions, psychosocial variables, and behaviors from the 2010 wave. IADL was measured by the 13-item Tokyo Metropolitan Institute of Gerontology Index of Competence. Scores ranged from 0-13 points for total IADL, 0-5 points for instrumental IADL, 0-4 points for intellectual IADL, and 0-4 points for social IADL, where smaller scores indicate lower functional independence. Thus, decrease in this outcome indicate increased functional limitation. Top 10 % of the distributions of CATEs were labeled as a "Resilient" group because they showed weaker associations between home loss and decreased outcome. Bottom 10 % of the distributions of CATEs were labeled as a "Vulnerable" group because they showed greater associations between home loss and decreased outcome.

<sup>b</sup> P-values for between-group differences. We used Wilcoxon rank sum test for continuous variables and Fisher's exact test for categorical variables.



**Web Table 9. Pre-disaster characteristics of people at bottom 10% vs top 10% of the estimated conditional average treatment effect of home loss on activities of daily living scores in 2013 and 2016.<sup>a</sup>**

| Baseline Characteristics                            | Year: 2013 (n = 3,350) |                         |                          | Year: 2016 (n = 2,664) |                         |                          |
|-----------------------------------------------------|------------------------|-------------------------|--------------------------|------------------------|-------------------------|--------------------------|
|                                                     | Resilient<br>(n = 340) | Vulnerable<br>(n = 340) | p-<br>value <sup>b</sup> | Resilient<br>(n = 280) | Vulnerable<br>(n = 280) | p-<br>value <sup>b</sup> |
| <b>CATE Estimates, mean (SD)<sup>e</sup></b>        | -0.02 (0.01)           | -0.24 (0.04)            | <0.001                   | 0.03 (0.02)            | -0.23 (0.06)            | <0.001                   |
| <b>Age, mean (SD)</b>                               | 68.18 (2.62)           | 81.57 (4.65)            | <0.001                   | 68.53 (2.92)           | 80.78 (3.42)            | <0.001                   |
| <b>Gender, n (%)</b>                                |                        |                         | <0.001                   |                        |                         | <0.001                   |
| Men                                                 | 101 (30%)              | 247 (73%)               |                          | 114 (41%)              | 178 (64%)               |                          |
| Women                                               | 239 (70%)              | 93 (27%)                |                          | 166 (59%)              | 102 (36%)               |                          |
| <b>Marital status, n (%)</b>                        |                        |                         | <0.001                   |                        |                         | <0.001                   |
| Married                                             | 334 (98%)              | 150 (44%)               |                          | 255 (91%)              | 160 (57%)               |                          |
| Widowed                                             | 3 (0.9%)               | 178 (52%)               |                          | 14 (5.0%)              | 109 (39%)               |                          |
| Divorced                                            | 3 (0.9%)               | 4 (1.2%)                |                          | 6 (2.1%)               | 7 (2.5%)                |                          |
| Single                                              | 0 (0%)                 | 7 (2.1%)                |                          | 3 (1.1%)               | 3 (1.1%)                |                          |
| Others                                              | 0 (0%)                 | 1 (0.3%)                |                          | 2 (0.7%)               | 1 (0.4%)                |                          |
| <b>Living alone, n (%)</b>                          |                        |                         | <0.001                   |                        |                         | 0.001                    |
| No                                                  | 337 (99%)              | 291 (86%)               |                          | 269 (96%)              | 248 (89%)               |                          |
| Yes                                                 | 3 (0.9%)               | 49 (14%)                |                          | 11 (3.9%)              | 32 (11%)                |                          |
| <b>Education, n (%)</b>                             |                        |                         | <0.001                   |                        |                         | <0.001                   |
| Less than 6 years                                   | 1 (0.3%)               | 12 (3.5%)               |                          | 0 (0%)                 | 6 (2.1%)                |                          |
| 6-9 years                                           | 50 (15%)               | 172 (51%)               |                          | 44 (16%)               | 114 (41%)               |                          |
| 10-12 years                                         | 178 (52%)              | 116 (34%)               |                          | 148 (53%)              | 107 (38%)               |                          |
| 13 years or more                                    | 109 (32%)              | 37 (11%)                |                          | 86 (31%)               | 49 (18%)                |                          |
| Others                                              | 2 (0.6%)               | 3 (0.9%)                |                          | 2 (0.7%)               | 4 (1.4%)                |                          |
| <b>Job, n (%)</b>                                   |                        |                         | <0.001                   |                        |                         | <0.001                   |
| Working                                             | 109 (32%)              | 17 (5.0%)               |                          | 83 (30%)               | 16 (5.7%)               |                          |
| Retired                                             | 222 (65%)              | 179 (53%)               |                          | 182 (65%)              | 182 (65%)               |                          |
| Never worked                                        | 9 (2.6%)               | 144 (42%)               |                          | 15 (5.4%)              | 82 (29%)                |                          |
| <b>Household income, mean (SD)</b>                  | 270.69<br>(151.07)     | 235.72<br>(113.53)      | 0.003                    | 260.29<br>(116.96)     | 257.05<br>(126.67)      | 0.5                      |
| <b>Depressive symptoms, n (%)</b>                   |                        |                         | <0.001                   |                        |                         | <0.001                   |
| Mild/severe depressive symptoms                     | 33 (9.7%)              | 134 (39%)               |                          | 24 (8.6%)              | 84 (30%)                |                          |
| No depressive symptoms                              | 307 (90%)              | 206 (61%)               |                          | 256 (91%)              | 196 (70%)               |                          |
| <b>Self-rated health, n (%)</b>                     |                        |                         | <0.001                   |                        |                         | 0.03                     |
| Very good                                           | 77 (23%)               | 26 (7.6%)               |                          | 39 (14%)               | 30 (11%)                |                          |
| Good                                                | 253 (74%)              | 213 (63%)               |                          | 221 (79%)              | 210 (75%)               |                          |
| Not good                                            | 10 (2.9%)              | 81 (24%)                |                          | 18 (6.4%)              | 32 (11%)                |                          |
| Bad                                                 | 0 (0%)                 | 20 (5.9%)               |                          | 2 (0.7%)               | 8 (2.9%)                |                          |
| <b>Body mass index, mean (SD)</b>                   | 24.87 (2.87)           | 23.03 (3.05)            | <0.001                   | 24.02 (2.25)           | 23.10 (2.63)            | <0.001                   |
| <b>Total IADL, mean (SD)</b>                        | 12.39 (0.90)           | 10.42 (3.08)            | <0.001                   | 12.03 (1.46)           | 12.21 (1.40)            | 0.047                    |
| <b>Instrumental IADL, mean (SD)<sup>e</sup></b>     | 4.82 (0.43)            | 4.18 (1.39)             | <0.001                   | 4.71 (0.69)            | 4.87 (0.50)             | <0.001                   |
| <b>Intellectual IADL, mean (SD)<sup>e</sup></b>     | 3.82 (0.46)            | 3.29 (1.02)             | <0.001                   | 3.84 (0.51)            | 3.77 (0.56)             | 0.035                    |
| <b>Social IADL, mean (SD)<sup>e</sup></b>           | 3.74 (0.49)            | 2.96 (1.27)             | <0.001                   | 3.48 (0.79)            | 3.59 (0.83)             | 0.014                    |
| <b>ADL, mean (SD)</b>                               | 3.00 (0.00)            | 2.94 (0.29)             | <0.001                   | 3.00 (0.06)            | 3.00 (0.06)             | >0.9                     |
| <b># of Treatment for major diseases, mean (SD)</b> | 0.94 (1.01)            | 2.14 (1.65)             | <0.001                   | 1.16 (1.12)            | 1.78 (1.38)             | <0.001                   |
| <b>Trust in local people, n (%)</b>                 |                        |                         | <0.001                   |                        |                         | <0.001                   |

|                                                  |           |           |        |           |           |        |
|--------------------------------------------------|-----------|-----------|--------|-----------|-----------|--------|
| Very much                                        | 12 (3.5%) | 66 (19%)  |        | 13 (4.6%) | 57 (20%)  |        |
| Moderate                                         | 275 (81%) | 152 (45%) |        | 186 (66%) | 166 (59%) |        |
| Neutral                                          | 46 (14%)  | 110 (32%) |        | 70 (25%)  | 50 (18%)  |        |
| Not very much                                    | 7 (2.1%)  | 8 (2.4%)  |        | 11 (3.9%) | 5 (1.8%)  |        |
| Not at all                                       | 0 (0%)    | 4 (1.2%)  |        | 0 (0%)    | 2 (0.7%)  |        |
| <b>Mutual help in community, n (%)</b>           |           |           | <0.001 |           |           | <0.001 |
| Very much                                        | 4 (1.2%)  | 47 (14%)  |        | 2 (0.7%)  | 45 (16%)  |        |
| Moderate                                         | 236 (69%) | 154 (45%) |        | 146 (52%) | 161 (57%) |        |
| Neutral                                          | 80 (24%)  | 106 (31%) |        | 102 (36%) | 60 (21%)  |        |
| Not very much                                    | 20 (5.9%) | 26 (7.6%) |        | 26 (9.3%) | 12 (4.3%) |        |
| Not at all                                       | 0 (0%)    | 7 (2.1%)  |        | 4 (1.4%)  | 2 (0.7%)  |        |
| <b>Attachment to community, n (%)</b>            |           |           | <0.001 |           |           | <0.001 |
| Very much                                        | 75 (22%)  | 115 (34%) |        | 33 (12%)  | 118 (42%) |        |
| Moderate                                         | 239 (70%) | 154 (45%) |        | 183 (65%) | 140 (50%) |        |
| Neutral                                          | 14 (4.1%) | 51 (15%)  |        | 47 (17%)  | 16 (5.7%) |        |
| Not very much                                    | 11 (3.2%) | 14 (4.1%) |        | 16 (5.7%) | 5 (1.8%)  |        |
| Not at all                                       | 1 (0.3%)  | 6 (1.8%)  |        | 1 (0.4%)  | 1 (0.4%)  |        |
| <b>Participation in sport clubs, n (%)</b>       |           |           | <0.001 |           |           | 0.3    |
| Everyday                                         | 0 (0%)    | 2 (0.6%)  |        | 1 (0.4%)  | 1 (0.4%)  |        |
| A few times a week                               | 33 (9.7%) | 20 (5.9%) |        | 23 (8.2%) | 38 (14%)  |        |
| Once a week                                      | 42 (12%)  | 26 (7.6%) |        | 28 (10%)  | 33 (12%)  |        |
| 1-2 times a month                                | 31 (9.1%) | 8 (2.4%)  |        | 15 (5.4%) | 10 (3.6%) |        |
| A few times a year                               | 30 (8.8%) | 8 (2.4%)  |        | 17 (6.1%) | 15 (5.4%) |        |
| Not at all                                       | 204 (60%) | 276 (81%) |        | 196 (70%) | 183 (65%) |        |
| <b>Participation in hobby clubs, n (%)</b>       |           |           | <0.001 |           |           | 0.001  |
| Everyday                                         | 5 (1.5%)  | 0 (0%)    |        | 2 (0.7%)  | 2 (0.7%)  |        |
| A few times a week                               | 25 (7.4%) | 32 (9.4%) |        | 19 (6.8%) | 41 (15%)  |        |
| Once a week                                      | 34 (10%)  | 34 (10%)  |        | 36 (13%)  | 42 (15%)  |        |
| 1-2 times a month                                | 65 (19%)  | 36 (11%)  |        | 45 (16%)  | 64 (23%)  |        |
| A few times a year                               | 53 (16%)  | 18 (5.3%) |        | 32 (11%)  | 21 (7.5%) |        |
| Not at all                                       | 158 (46%) | 220 (65%) |        | 146 (52%) | 110 (39%) |        |
| <b>Frequency of meeting friends, n (%)</b>       |           |           | <0.001 |           |           | <0.001 |
| Every day                                        | 38 (11%)  | 41 (12%)  |        | 1 (0.4%)  | 51 (18%)  |        |
| 2-3 times a week                                 | 76 (22%)  | 91 (27%)  |        | 61 (22%)  | 77 (28%)  |        |
| Once a week                                      | 64 (19%)  | 52 (15%)  |        | 46 (16%)  | 61 (22%)  |        |
| 1-2 times a month                                | 86 (25%)  | 59 (17%)  |        | 77 (28%)  | 57 (20%)  |        |
| A few times a year                               | 74 (22%)  | 43 (13%)  |        | 76 (27%)  | 27 (9.6%) |        |
| Not at all                                       | 2 (0.6%)  | 54 (16%)  |        | 19 (6.8%) | 7 (2.5%)  |        |
| <b># of friends interacted last month, n (%)</b> |           |           | <0.001 |           |           | 0.044  |
| 0                                                | 5 (1.5%)  | 47 (14%)  |        | 16 (5.7%) | 8 (2.9%)  |        |
| 1-2 friends                                      | 29 (8.5%) | 86 (25%)  |        | 55 (20%)  | 34 (12%)  |        |
| 3-5 friends                                      | 88 (26%)  | 83 (24%)  |        | 70 (25%)  | 85 (30%)  |        |
| 6-9 friends                                      | 59 (17%)  | 41 (12%)  |        | 41 (15%)  | 47 (17%)  |        |
| 10 or more friends                               | 159 (47%) | 83 (24%)  |        | 98 (35%)  | 106 (38%) |        |
| <b>Received emotional social support, n (%)</b>  | 9 (2.6%)  | 29 (8.5%) | 0.001  | 13 (4.6%) | 11 (3.9%) | 0.8    |
| <b>Provision of emotional support, n (%)</b>     | 6 (1.8%)  | 50 (15%)  | <0.001 | 10 (3.6%) | 20 (7.1%) | 0.09   |
| <b>Received care support, n (%)</b>              | 10 (2.9%) | 9 (2.6%)  | >0.9   | 8 (2.9%)  | 3 (1.1%)  | 0.2    |

|                                                             |              |              |        |              |              |        |
|-------------------------------------------------------------|--------------|--------------|--------|--------------|--------------|--------|
| <b>Provision of care support, n (%)</b>                     | 3 (0.9%)     | 98 (29%)     | <0.001 | 11 (3.9%)    | 37 (13%)     | <0.001 |
| <b>Communication with neighbors, n (%)</b>                  |              |              | 0.016  |              |              | <0.001 |
| Very much                                                   | 64 (19%)     | 77 (23%)     |        | 36 (13%)     | 93 (33%)     |        |
| Moderate                                                    | 222 (65%)    | 184 (54%)    |        | 175 (62%)    | 155 (55%)    |        |
| Minimum                                                     | 52 (15%)     | 73 (21%)     |        | 67 (24%)     | 31 (11%)     |        |
| Not at all                                                  | 2 (0.6%)     | 6 (1.8%)     |        | 2 (0.7%)     | 1 (0.4%)     |        |
| <b># of negative events in the past year, mean (SD)</b>     | 0.64 (0.78)  | 0.65 (0.71)  | 0.7    | 0.59 (0.70)  | 0.67 (0.73)  | 0.2    |
| <b>Sense of coherence, mean (SD)</b>                        | 23.68 (3.60) | 21.72 (4.13) | <0.001 | 24.13 (2.68) | 21.94 (4.10) | <0.001 |
| <b>Current smoking status, n (%)</b>                        |              |              | <0.001 |              |              | <0.001 |
| Never                                                       | 139 (41%)    | 264 (78%)    |        | 138 (49%)    | 199 (71%)    |        |
| Quit                                                        | 127 (37%)    | 62 (18%)     |        | 87 (31%)     | 63 (22%)     |        |
| Smoking                                                     | 74 (22%)     | 14 (4.1%)    |        | 55 (20%)     | 18 (6.4%)    |        |
| <b>Current alcohol drinking, n (%)</b>                      |              |              | <0.001 |              |              | <0.001 |
| Drinking                                                    | 222 (65%)    | 62 (18%)     |        | 153 (55%)    | 72 (26%)     |        |
| Quit                                                        | 11 (3.2%)    | 10 (2.9%)    |        | 5 (1.8%)     | 7 (2.5%)     |        |
| Never                                                       | 107 (31%)    | 268 (79%)    |        | 122 (44%)    | 201 (72%)    |        |
| <b>Frequency of fish and meat consumption, n (%)</b>        |              |              | 0.074  |              |              | 0.3    |
| Twice a day or more often                                   | 54 (16%)     | 40 (12%)     |        | 37 (13%)     | 39 (14%)     |        |
| Once a day                                                  | 141 (41%)    | 131 (39%)    |        | 133 (48%)    | 114 (41%)    |        |
| 4-6 times a week                                            | 69 (20%)     | 66 (19%)     |        | 58 (21%)     | 52 (19%)     |        |
| 2-3 times a week                                            | 67 (20%)     | 80 (24%)     |        | 47 (17%)     | 67 (24%)     |        |
| Once a week                                                 | 7 (2.1%)     | 16 (4.7%)    |        | 3 (1.1%)     | 6 (2.1%)     |        |
| Less than once a week                                       | 2 (0.6%)     | 3 (0.9%)     |        | 2 (0.7%)     | 2 (0.7%)     |        |
| Not at all                                                  | 0 (0%)       | 4 (1.2%)     |        |              |              |        |
| <b>Frequency of fruits and vegetable consumption, n (%)</b> |              |              | 0.2    |              |              | 0.3    |
| Twice a day or more often                                   | 202 (59%)    | 188 (55%)    |        | 159 (57%)    | 166 (59%)    |        |
| Once a day                                                  | 92 (27%)     | 103 (30%)    |        | 90 (32%)     | 85 (30%)     |        |
| 4-6 times a week                                            | 36 (11%)     | 27 (7.9%)    |        | 27 (9.6%)    | 18 (6.4%)    |        |
| 2-3 times a week                                            | 8 (2.4%)     | 17 (5.0%)    |        | 4 (1.4%)     | 9 (3.2%)     |        |
| Once a week                                                 | 2 (0.6%)     | 2 (0.6%)     |        | 0 (0%)       | 1 (0.4%)     |        |
| Less than once a week                                       | 0 (0%)       | 1 (0.3%)     |        | 0 (0%)       | 1 (0.4%)     |        |
| Not at all                                                  | 0 (0%)       | 2 (0.6%)     |        |              |              |        |
| <b>Frequency of going out, n (%)</b>                        |              |              | <0.001 |              |              | <0.001 |
| Every day                                                   | 245 (72%)    | 94 (28%)     |        | 186 (66%)    | 116 (41%)    |        |
| 2-3 times a week                                            | 77 (23%)     | 111 (33%)    |        | 77 (28%)     | 110 (39%)    |        |
| Once a week                                                 | 17 (5.0%)    | 27 (7.9%)    |        | 11 (3.9%)    | 33 (12%)     |        |
| 1-2 times a month                                           | 1 (0.3%)     | 56 (16%)     |        | 6 (2.1%)     | 14 (5.0%)    |        |
| A few times a year                                          | 0 (0%)       | 23 (6.8%)    |        | 0 (0%)       | 5 (1.8%)     |        |
| Not at all                                                  | 0 (0%)       | 29 (8.5%)    |        | 0 (0%)       | 2 (0.7%)     |        |
| <b>Having hobby, n (%)</b>                                  |              |              | <0.001 |              |              | <0.001 |
| Yes                                                         | 236 (69%)    | 180 (53%)    |        | 185 (66%)    | 221 (79%)    |        |
| No                                                          | 104 (31%)    | 160 (47%)    |        | 95 (34%)     | 59 (21%)     |        |

Abbreviations: ADL, Activity of Daily Living; CATE, Conditional average treatment effect; IADL, Instrumental Activity of Daily Living  
<sup>a</sup> Heterogeneous effects (i.e., conditional average treatment effects: CATEs) were estimated via the generalized random forest algorithm, using the 55 pre-disaster demographic and socioeconomic factors, health conditions, psychosocial variables, and behaviors from the 2010 wave. ADL had three levels (1= support needed completely, 2 = support needed partially, and 3 = no help needed). Thus, decrease in this outcome indicate increased functional limitation. Top 10 % of the distributions of CATEs were

labeled as a “Resilient” group because they showed weaker associations between home loss and decreased outcome. Bottom 10 % of the distributions of CATEs were labeled as a “Vulnerable” group because they showed greater associations between home loss and decreased outcome.

<sup>b</sup> P-values for between-group differences. We used Wilcoxon rank sum test for continuous variables and Fisher’s exact test for categorical variables.

**Web Table 10. Sensitivity analysis for associations between home loss and functional limitation in 2013<sup>a</sup>**

| Outcome             | Year                              | Average Treatment Effects <sup>b</sup> |                | Conditional Average Treatment Effects <sup>c</sup> |      |       |       |
|---------------------|-----------------------------------|----------------------------------------|----------------|----------------------------------------------------|------|-------|-------|
|                     |                                   | Estimate                               | 95% CI         | Mean                                               | SD   | Min   | Max   |
| Total IADL          | Main analysis                     | -0.50                                  | (-0.56, -0.44) | -0.68                                              | 0.27 | -1.95 | 0.06  |
|                     | Sensitivity analysis <sup>d</sup> | -0.55                                  | (-0.60, -0.50) | -0.56                                              | 0.16 | -1.25 | -0.08 |
| Physical Disability | Main analysis                     | -0.09                                  | (-0.13, -0.06) | -0.20                                              | 0.21 | -1.40 | 0.08  |
|                     | Sensitivity analysis <sup>d</sup> | -0.13                                  | (-0.16, -0.10) | -0.13                                              | 0.06 | -0.41 | -0.03 |
| ADL                 | Main analysis                     | -0.05                                  | (-0.07, -0.04) | -0.10                                              | 0.07 | -0.41 | 0.02  |
|                     | Sensitivity analysis <sup>d</sup> | -0.04                                  | (-0.05, -0.03) | -0.06                                              | 0.03 | -0.17 | 0.03  |

Abbreviations: ADL, Activity of Daily Living; IADL, Instrumental Activity of Daily Living.

<sup>a</sup> All models were adjusted for the 55 pre-disaster demographic and socioeconomic factors, health conditions, psychosocial variables, and behaviors from the 2010 wave. ADL had three levels (1 = support needed completely, 2 = support needed partially, and 3 = no help needed). IADL was measured by the 13-item Tokyo Metropolitan Institute of Gerontology Index of Competence. IADL scores ranged from 0-13 points, where smaller scores indicate lower functional independence. Levels of certified physical disability ranged from 1 ("Cannot roll over in a bed independently") to 9 ("no physical disability/not requesting care services"), where smaller values indicate greater levels of disability. Thus, lower values for these outcomes indicate greater functional limitation.

<sup>b</sup> Average treatment effects were estimated via the doubly-robust targeted maximum likelihood estimation. Models were estimated via the SuperLearner using generalized linear models, gradient boosting machine, and neural net as candidate estimators.

<sup>c</sup> Heterogeneous effects (i.e., conditional average treatment effects: CATEs) were estimated using generalized random forest algorithm, using the 55 pre-disaster demographic and socioeconomic factors, health conditions, psychosocial variables, and behaviors from the 2010 wave.

<sup>d</sup> We restricted the analytic sample to those who participated in both 2013 and 2016 waves.

**Web Table 11. Variable importance ranking**

| Outcome | Year                | Rank <sup>a</sup> | Pre-disaster characteristics | Proportion <sup>b</sup> | Spearman's Correlation <sup>c</sup> |
|---------|---------------------|-------------------|------------------------------|-------------------------|-------------------------------------|
| 2013    | Physical Disability | 1                 | Age                          | 0.15                    | -0.71                               |
|         |                     | 2                 | IADL                         | 0.11                    | 0.33                                |
|         |                     | 3                 | Income <sup>d</sup>          | 0.07                    | -0.01                               |
|         | Total IADL          | 1                 | Age                          | 0.10                    | -0.57                               |
|         |                     | 2                 | Sense of coherence scores    | 0.10                    | 0.32                                |
|         |                     | 3                 | BMI                          | 0.09                    | 0.34                                |
|         | ADL                 | 1                 | Frequency of going out       | 0.15                    | -0.31                               |
|         |                     | 2                 | IADL                         | 0.11                    | 0.25                                |
|         |                     | 3                 | Age                          | 0.09                    | -0.68                               |
| 2016    | Physical Disability | 1                 | Age                          | 0.13                    | -0.62                               |
|         |                     | 2                 | Income <sup>d</sup>          | 0.11                    | 0.16                                |
|         |                     | 3                 | Sense of coherence scores    | 0.07                    | 0.27                                |
|         | Total IADL          | 1                 | Sense of coherence scores    | 0.15                    | 0.33                                |
|         |                     | 2                 | Age                          | 0.13                    | -0.54                               |
|         |                     | 3                 | Self-rated Health            | 0.07                    | -0.06                               |
|         | ADL                 | 1                 | Age                          | 0.14                    | -0.65                               |
|         |                     | 2                 | Income <sup>d</sup>          | 0.09                    | 0.06                                |
|         |                     | 3                 | Frequency of meeting friends | 0.08                    | 0.18                                |

Abbreviations: ADL, Activity of Daily Living; BMI, Body Mass Index; IADL, Instrumental Activity of Daily Living.

<sup>a</sup>Variable importance ranking identifies variables that were most often used in splitting the trees.

<sup>b</sup>For each variable, the proportion of trees that used the variable in training is shown.

<sup>c</sup>Spearman's correlation coefficients were calculated for the relationship between each pre-disaster characteristic and predicted CATE.

<sup>d</sup>Income was log-transformed.

**Web Table 12. Comparison of pre-disaster characteristics across study samples.**

| Baseline Characteristics                                        | Disaster survivors<br>(n=4,299) | Sample for the<br>2013 outcomes<br>(n=3,350) | Sample for the<br>2016 outcomes<br>(n=2,664) |
|-----------------------------------------------------------------|---------------------------------|----------------------------------------------|----------------------------------------------|
| <b>Distance from the coast</b>                                  |                                 |                                              |                                              |
| <1,000m                                                         | 201 (4.7%)                      | 131 (3.9%)                                   | 91 (3.4%)                                    |
| ≥1,000m                                                         | 4,098 (95%)                     | 3,219 (96%)                                  | 2,573 (97%)                                  |
| <b>Home loss</b>                                                | NA                              | 149 (4.4%)                                   | 107 (4.0%)                                   |
| <b>Age (years), mean (SD)</b>                                   | 74 (6)                          | 73.2 (6.0)                                   | 72.5 (5.5)                                   |
| <b>Gender, n (%)</b>                                            |                                 |                                              |                                              |
| Men                                                             | 2,348 (55%)                     | 1,857 (55%)                                  | 1,486 (56%)                                  |
| Women                                                           | 1,951 (45%)                     | 1,493 (45%)                                  | 1,178 (44%)                                  |
| <b>Marital status, n (%)</b>                                    |                                 |                                              |                                              |
| Married                                                         | 2,962 (72%)                     | 2,364 (73%)                                  | 1,946 (75%)                                  |
| Widowed                                                         | 958 (23%)                       | 733 (23%)                                    | 533 (21%)                                    |
| Divorced                                                        | 124 (3.0%)                      | 83 (2.6%)                                    | 66 (2.6%)                                    |
| Single                                                          | 56 (1.4%)                       | 39 (1.2%)                                    | 28 (1.1%)                                    |
| Others                                                          | 30 (0.7%)                       | 18 (0.6%)                                    | 15 (0.6%)                                    |
| <b>Living alone, n (%)</b>                                      |                                 |                                              |                                              |
| No                                                              | 3,778 (91%)                     | 2,979 (91%)                                  | 2,391 (92%)                                  |
| Yes                                                             | 381 (9.2%)                      | 281 (8.6%)                                   | 213 (8.2%)                                   |
| <b>Education, n (%)</b>                                         |                                 |                                              |                                              |
| Less than 6 years                                               | 61 (1.5%)                       | 33 (1.0%)                                    | 21 (0.8%)                                    |
| 6-9 years                                                       | 1,426 (34%)                     | 1,103 (34%)                                  | 830 (32%)                                    |
| 10-12 years                                                     | 1,777 (43%)                     | 1,417 (44%)                                  | 1,166 (45%)                                  |
| 13 years or more                                                | 841 (20%)                       | 676 (21%)                                    | 572 (22%)                                    |
| Others                                                          | 43 (1.0%)                       | 26 (0.8%)                                    | 17 (0.7%)                                    |
| <b>Job, n (%)</b>                                               |                                 |                                              |                                              |
| Working                                                         | 675 (18%)                       | 550 (19%)                                    | 462 (19%)                                    |
| Retired                                                         | 2,434 (65%)                     | 1,892 (64%)                                  | 1,531 (65%)                                  |
| Never worked                                                    | 651 (17%)                       | 520 (18%)                                    | 378 (16%)                                    |
| <b>Household income [10,000 yen], mean (SD)<sup>a</sup></b>     | 230 (146)                       | 231 (141)                                    | 232 (138)                                    |
| <b>Depressive symptoms, n (%)<sup>b</sup></b>                   |                                 |                                              |                                              |
| Mild/severe depressive symptoms                                 | 1,141 (31%)                     | 857 (30%)                                    | 663 (28%)                                    |
| No depressive symptoms                                          | 2,539 (69%)                     | 2,039 (70%)                                  | 1,673 (72%)                                  |
| <b>Self-rated health, n (%)</b>                                 |                                 |                                              |                                              |
| Bad                                                             | 518 (12%)                       | 417 (13%)                                    | 343 (13%)                                    |
| Not good                                                        | 2,922 (69%)                     | 2,336 (71%)                                  | 1,891 (72%)                                  |
| Good                                                            | 651 (15%)                       | 458 (14%)                                    | 334 (13%)                                    |
| Very good                                                       | 125 (3.0%)                      | 75 (2.3%)                                    | 48 (1.8%)                                    |
| <b>Body mass index (m/kg<sup>2</sup>), mean (SD)</b>            | 23.5 (3.2)                      | 23.6 (3.1)                                   | 23.58 (3.02)                                 |
| <b>Total IADL, mean (SD)<sup>c</sup></b>                        | 11.64 (2.25)                    | 11.88 (1.80)                                 | 12.02 (1.59)                                 |
| <b>Instrumental IADL, mean (SD)<sup>c</sup></b>                 | 4.64 (0.96)                     | 4.73 (0.75)                                  | 4.78 (0.65)                                  |
| <b>Intellectual IADL, mean (SD)<sup>c</sup></b>                 | 3.60 (0.81)                     | 3.66 (0.69)                                  | 3.71 (0.62)                                  |
| <b>Social IADL, mean (SD)<sup>c</sup></b>                       | 3.38 (1.01)                     | 3.46 (0.91)                                  | 3.51 (0.87)                                  |
| <b>ADL, mean (SD)<sup>d</sup></b>                               | 2.96 (0.25)                     | 2.98 (0.15)                                  | 2.99 (0.10)                                  |
| <b># of Treatment for major diseases, mean (SD)<sup>e</sup></b> | 2.15 (1.41)                     | 2.08 (1.33)                                  | 2.02 (1.27)                                  |

Note. Abbreviations: ADL, Activity of Daily Living; IADL, Instrumental Activity of Daily Living

<sup>a</sup> Annual household income was divided by the square root of the number of household members to account for household size.

<sup>b</sup> We used the Geriatric Depression Scale (range: 0-15 points; higher scores indicate more depressive symptoms) to assess depressive symptoms. We used a cut-off of  $\geq 5$  points to define moderate/severe depressive symptoms.

<sup>c</sup> IADL was measured by the 13-item Tokyo Metropolitan Institute of Gerontology Index of Competence. Scores ranged from 0-13 points for total IADL, 0-5 points for instrumental IADL, 0-4 points for intellectual IADL, and 0-4 points for social IADL, where smaller scores indicate lower functional independence.

<sup>d</sup> ADL had three levels (1= support needed completely, 2 = support needed partially, and 3 = no help needed).

<sup>e</sup> We calculated counts of current treatment for major diseases, including cancer, heart diseases, stroke, hypertension, diabetes, obesity, hyperlipidemia, osteoporosis, arthritis, fracture, respiratory diseases, gastrointestinal diseases, liver diseases, psychiatric diseases, dysphagia, visual impairment, hearing loss, dysuria, and insomnia.



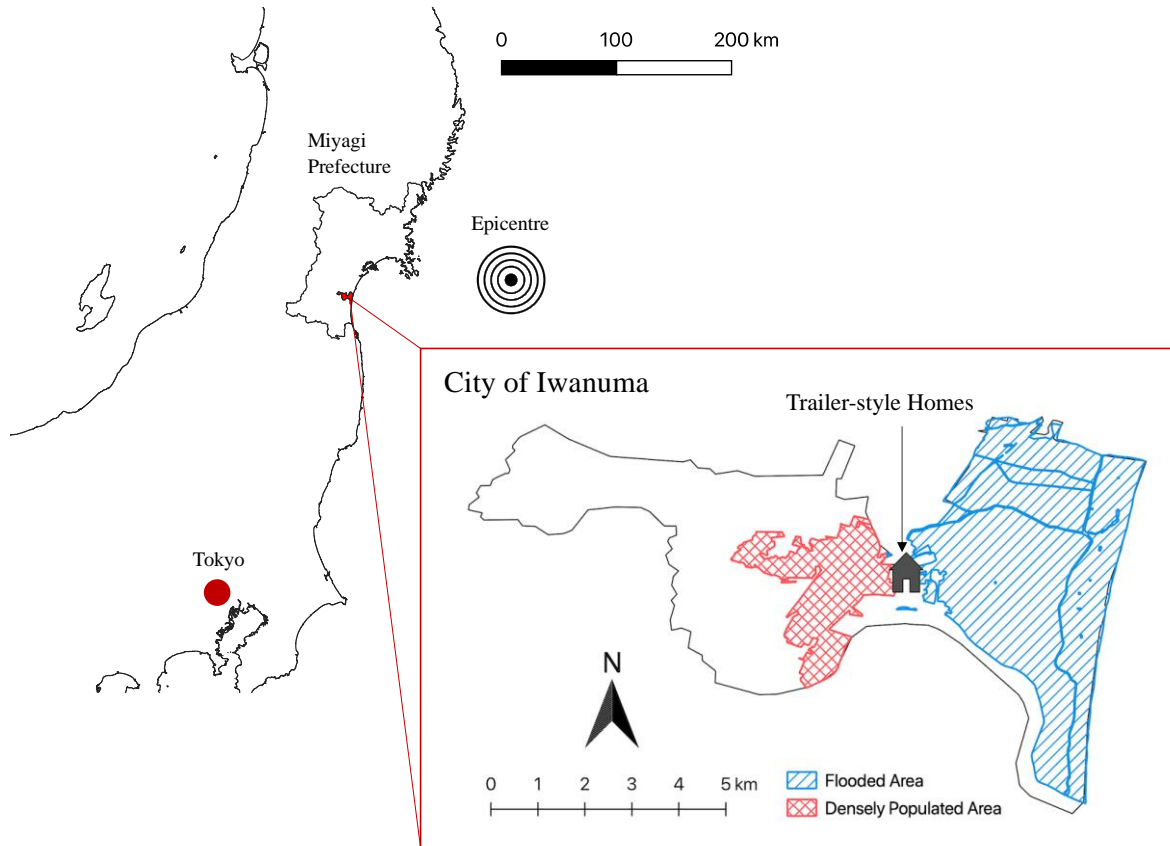

**Web Figure 1. Map of Iwanuma city.**

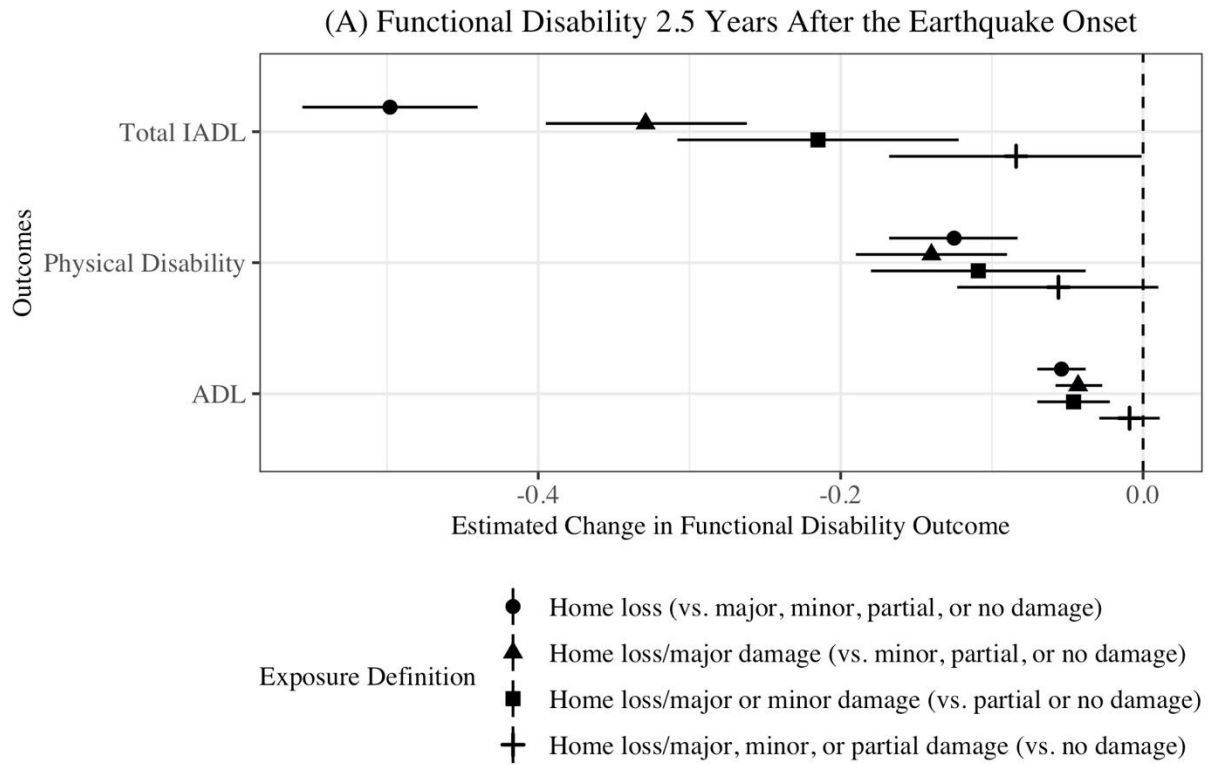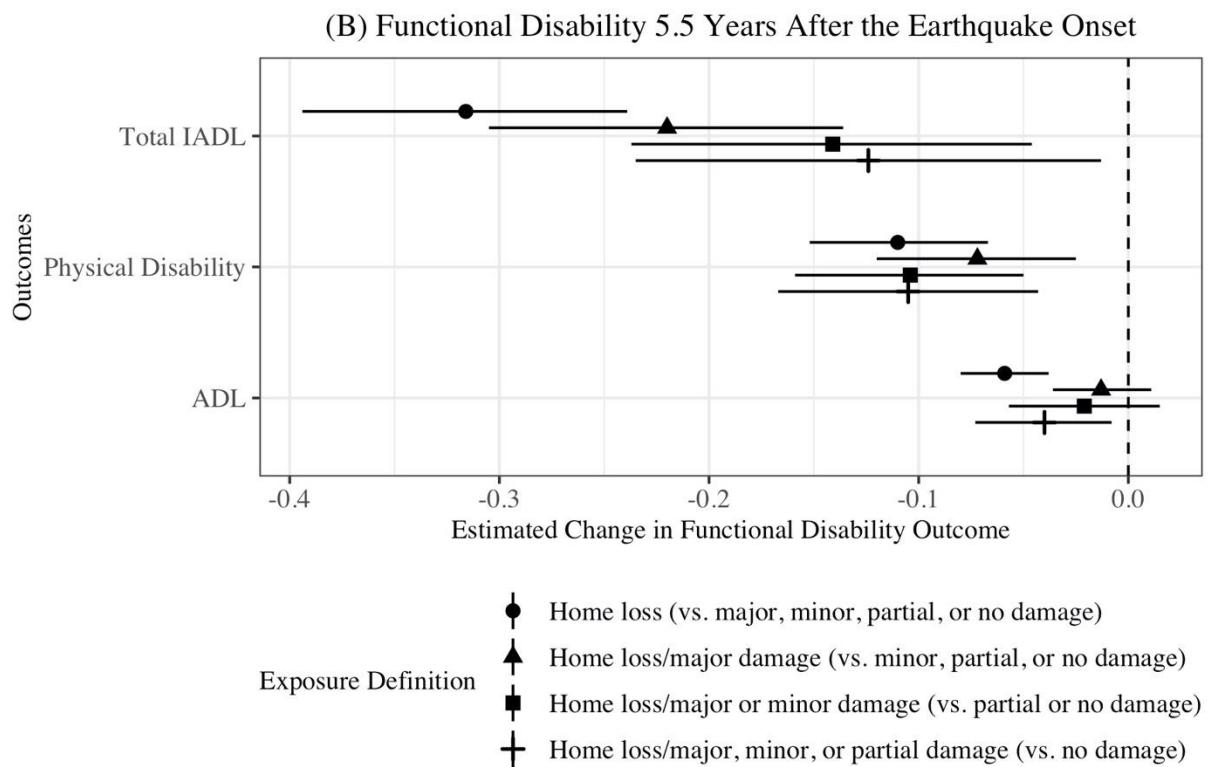

**Web Figure 2. Sensitivity analysis for population average treatment effects of housing damage on functional limitation in 2013 and 2016.**

Abbreviations: ADL, Activity of Daily Living; IADL, Instrumental Activity of Daily Living.

Population average effects (i.e., average treatment effects) of the exposures were estimated via the doubly-robust targeted maximum likelihood estimation. Models were estimated data-adaptively via the SuperLearner using generalized linear models, gradient boosting machine, and neural net as candidate estimators. All models were adjusted for the 55 pre-disaster demographic and socioeco-nomic factors, health conditions, psychosocial variables, and behaviors from the 2010 wave. ADL had three levels (1= support needed completely, 2 = support needed partially, and 3 = no help needed). IADL was measured by the 13-item Tokyo Metropolitan Institute of Gerontology Index of Competence. IADL scores ranged from 0-13 points, where smaller scores indicate lower functional independence. Levels of certified physical disability ranged from 1 ("Cannot roll over in a bed independently") to 9 ("no physical disability/not requesting care services"), where smaller values indicate greater levels of disability. Thus, decrease in these outcomes indicate increased functional limitation.

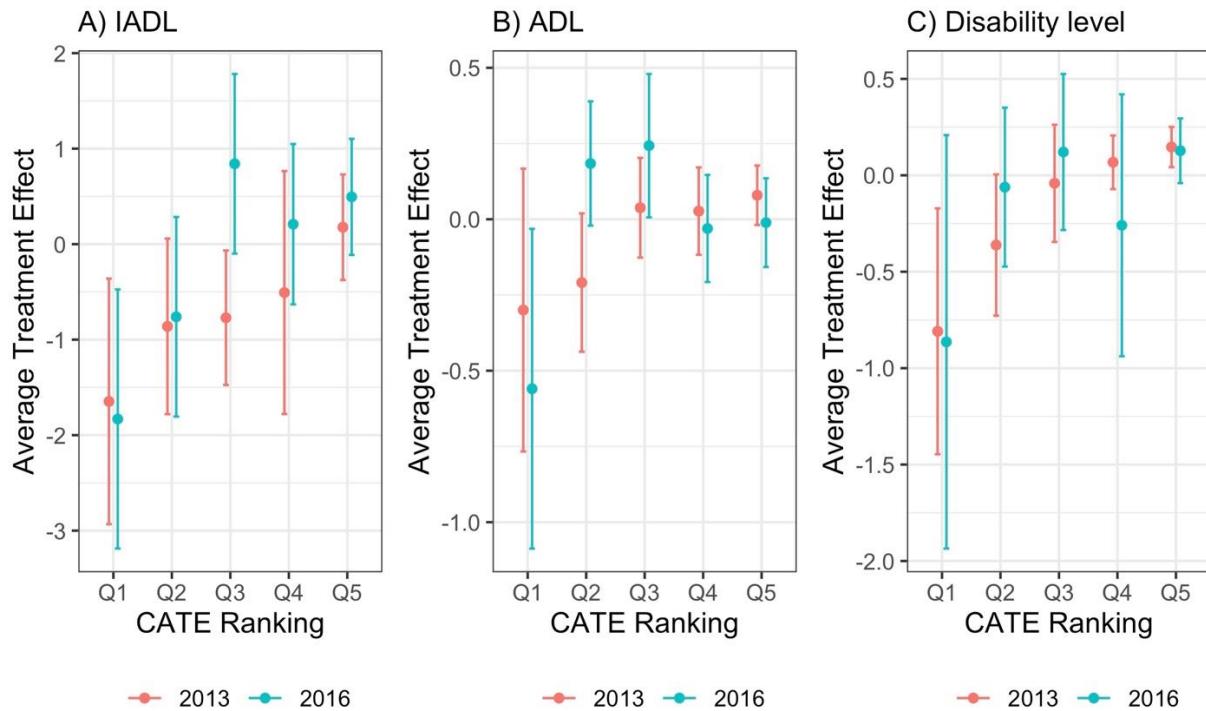

**Web Figure 3. Causal forest calibration plots for outcomes A) IADL, B) ADL, and C) physical disability level.**

Note. Abbreviations: ADL, Activity of Daily Living; IADL, Instrumental Activity of Daily Living  
 We followed the instructions provided in the GRF online tutorial material (<https://bookdown.org/halflearned/ml-ci-tutorial/hte-i-binary-treatment.html#via-grf>). CATE quintiles were determined within each fold used for cross-fitting and aggregated across folds. Monotonically increasing trend indicates a good fit. Average treatment effects of the exposure were estimated via the doubly-robust targeted maximum likelihood estimation. Models were estimated data-adaptively via the SuperLearner using generalized linear models, gradient boosting machine, and neural net as candidate estimators. All models were adjusted for the 55 pre-disaster demographic and socioeco-nomic factors, health conditions, psychosocial variables, and behaviors from the 2010 wave. ADL had three levels (1= support needed completely, 2 = support needed partially, and 3 = no help needed). IADL was measured by the 13-item Tokyo Metropolitan Institute of Gerontology Index of Competence. IADL scores ranged from 0-13 points, where smaller scores indicate lower functional independence. Levels of certified physical disability ranged from 1 (“Cannot roll over in a bed independently”) to 9 (“no physical disability/not requesting care services”), where smaller values indicate greater levels of disability. Thus, decrease in these outcomes indicate increased functional limitation.

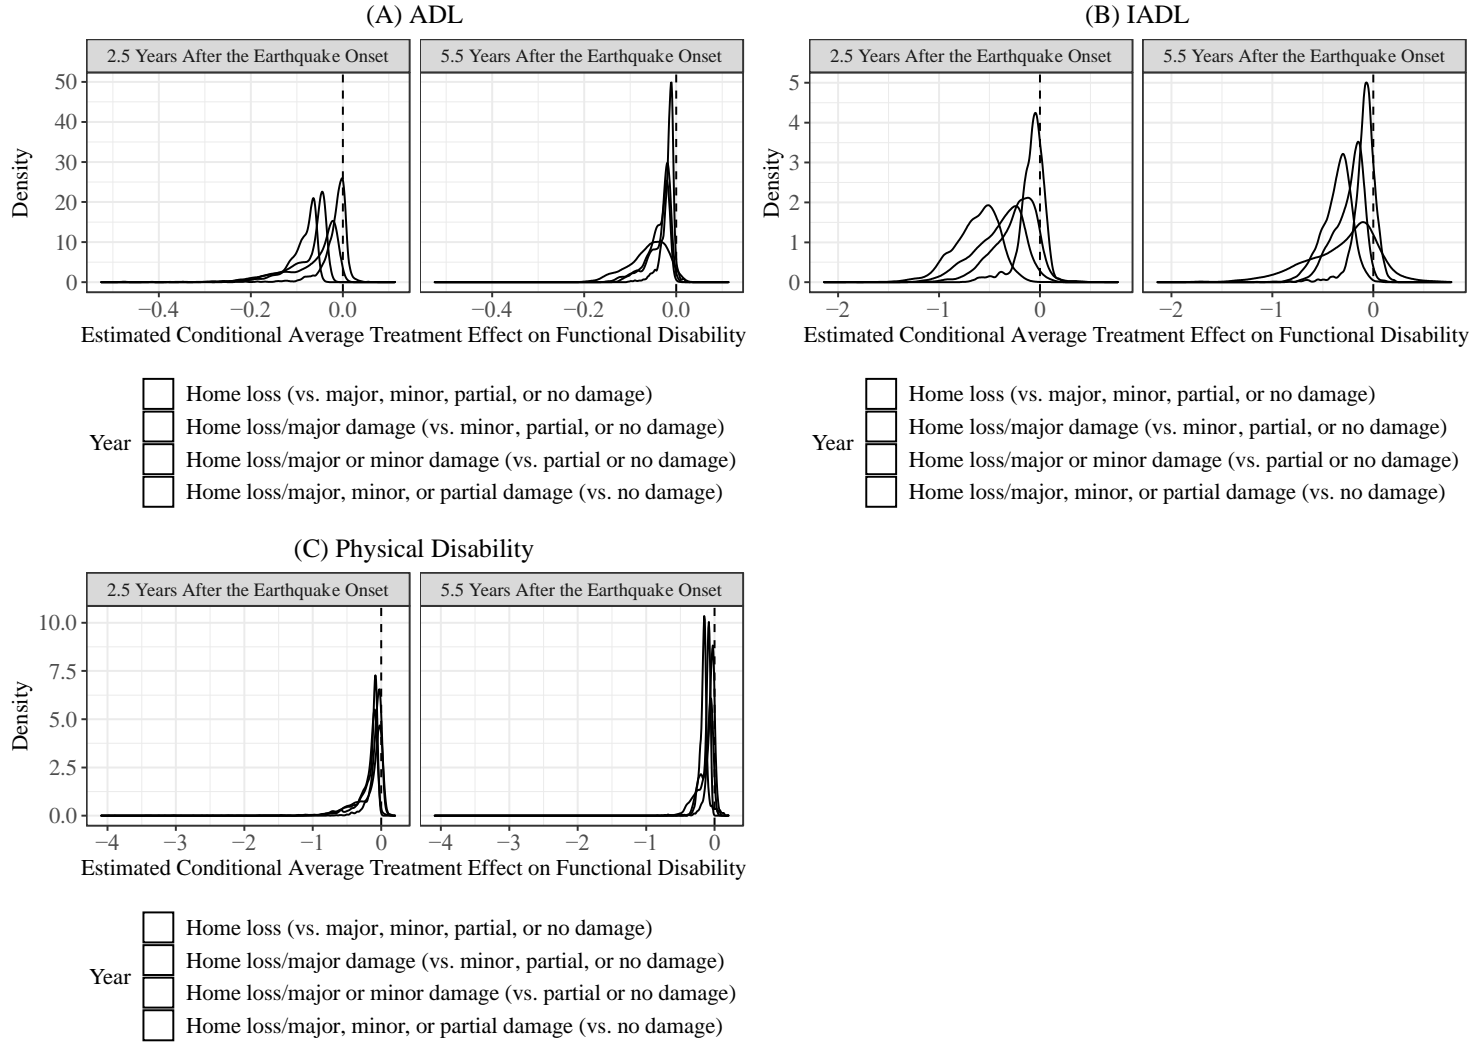

**Web Figure 4. Sensitivity analysis for conditional average treatment effects of housing damage on functional limitation in 2013 and 2016.**

Abbreviations: ADL, Activity of Daily Living; IADL, Instrumental Activity of Daily Living.

Heterogeneous effects (i.e., conditional average treatment effects: CATEs) were estimated using generalized random forest algorithm, using the 55 pre-disaster demographic and socioeconomic factors, health conditions, psychosocial variables, and behaviors from the 2010 wave. ADL had three levels (1= support needed completely, 2 = support needed

partially, and 3 = no help needed). IADL was measured by the 13-item Tokyo Metropolitan Institute of Gerontology Index of Competence. Scores ranged from 0-13 points for total IADL, where smaller scores indicate lower functional independence. Levels of certified physical disability ranged from 1 ("Cannot roll over in a bed independently") to 9 ("no physical disability/not requesting care services"), where smaller values indicate greater levels of disability. Thus, decrease in these outcomes indicate increased functional limitation.

A) Outcome: Physical Disability

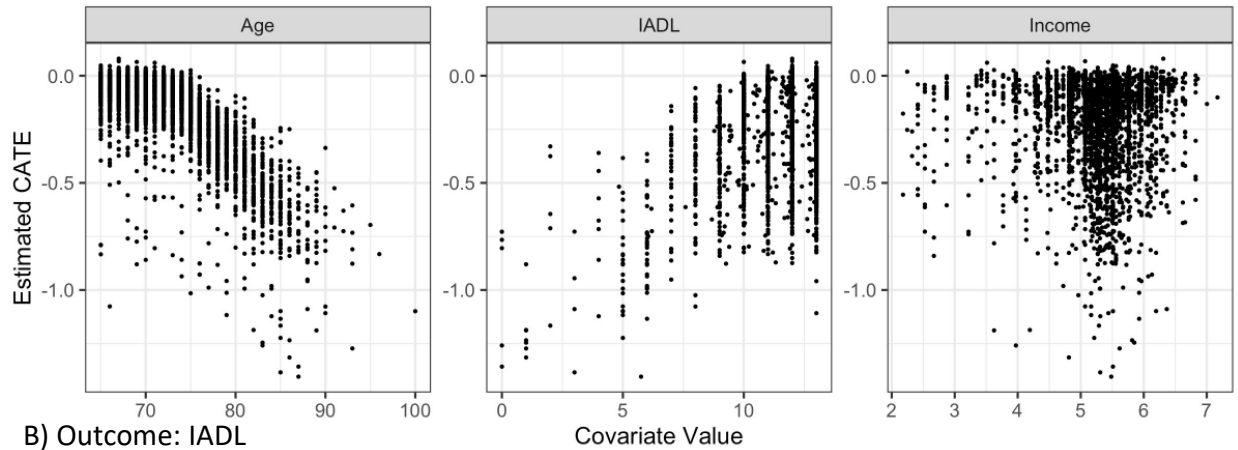

B) Outcome: IADL

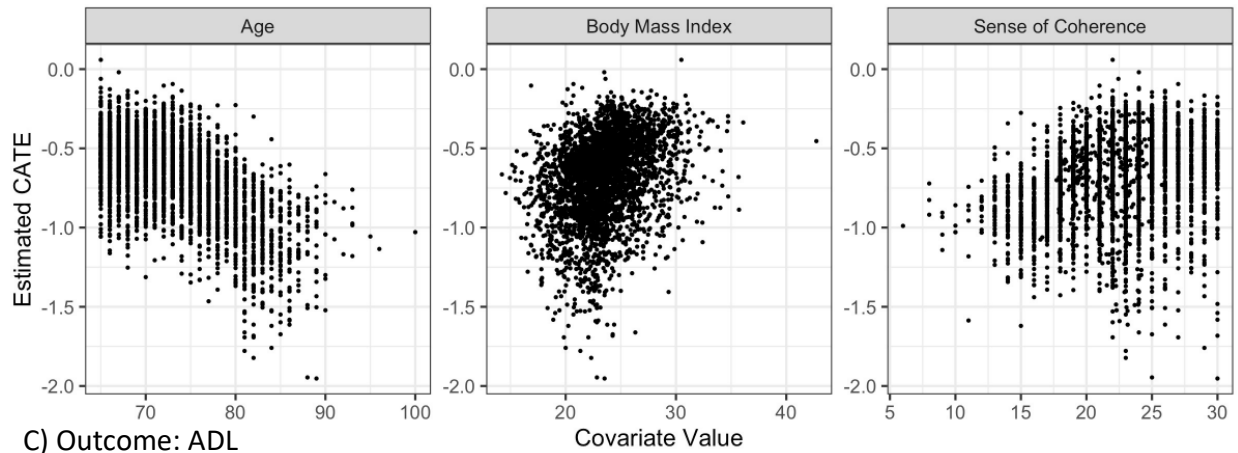

C) Outcome: ADL

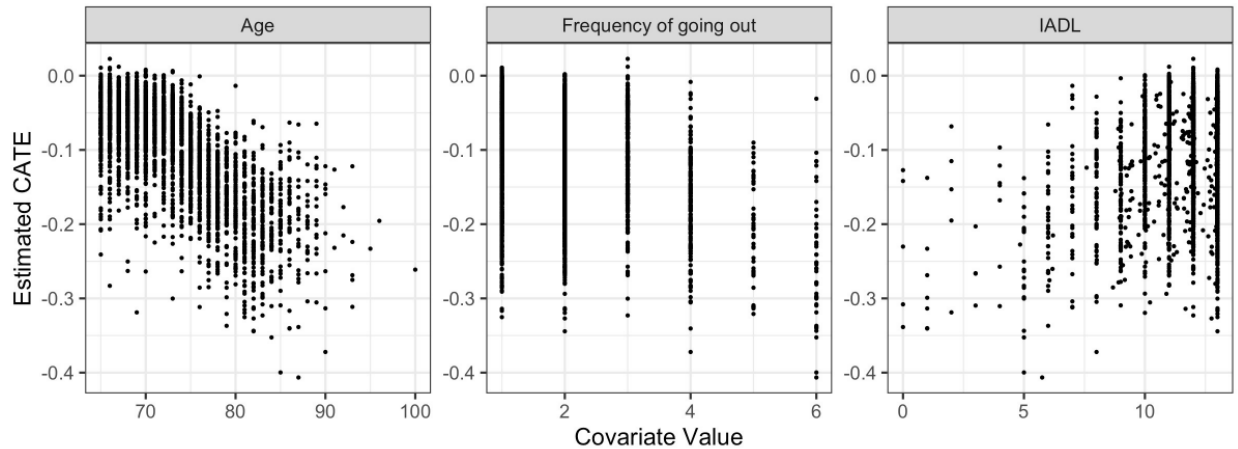

**Web Figure 5. Distribution of estimated conditional average treatment effects of home loss on functional limitation outcomes in 2013 by covariate values.**

The three covariates were chosen based on the variable importance ranking shown in Web Table 11. Heterogeneous effects (i.e., conditional average treatment effects: CATEs) were estimated using generalized random forest algorithm, using the 55 pre-disaster demographic and socioeconomic factors, health conditions, psychosocial variables, and behaviors from the 2010 wave. Decrease in the outcomes indicates increased functional limitation; hence, smaller CATEs indicates more adverse impacts of home loss.

A) Outcome: Physical Disability

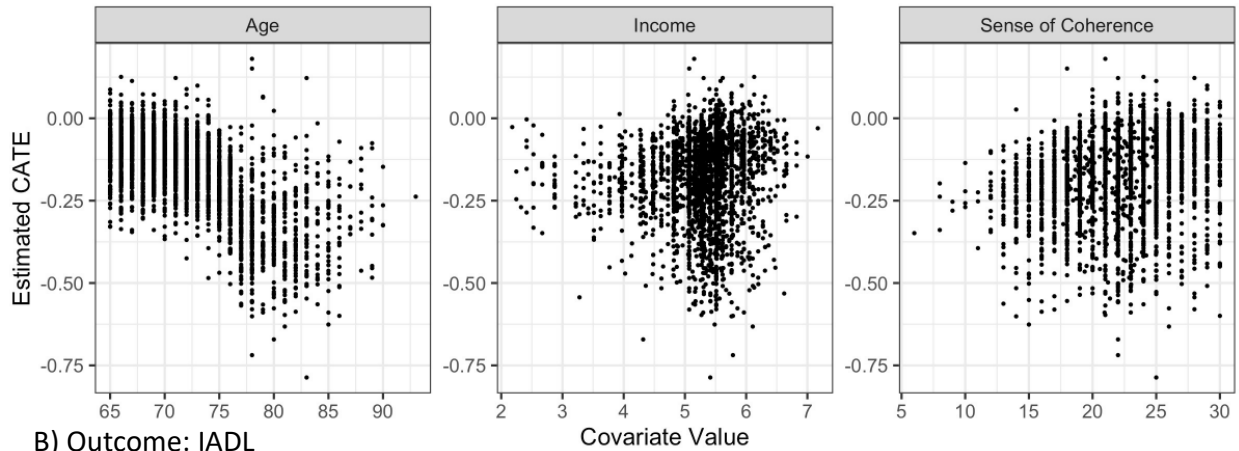

B) Outcome: IADL

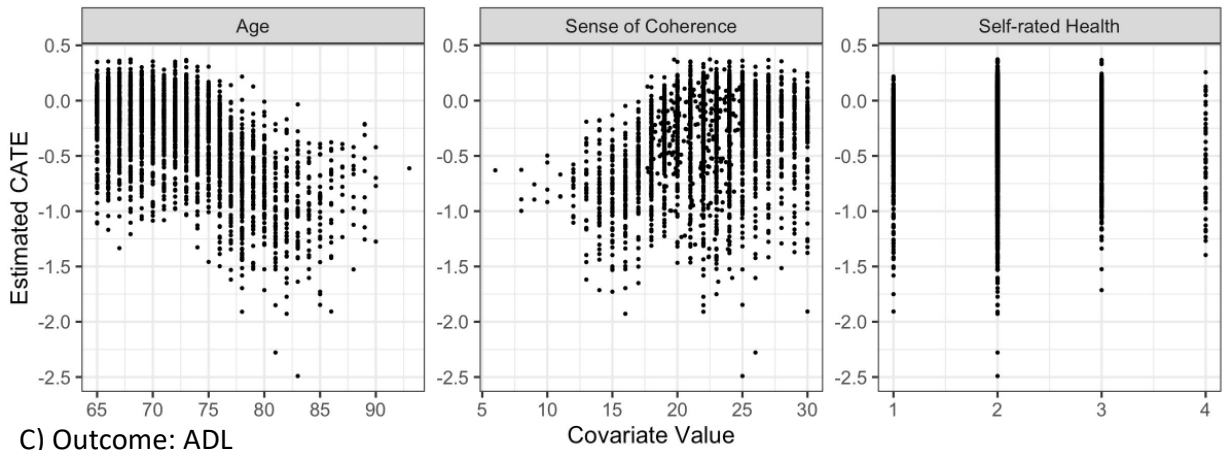

C) Outcome: ADL

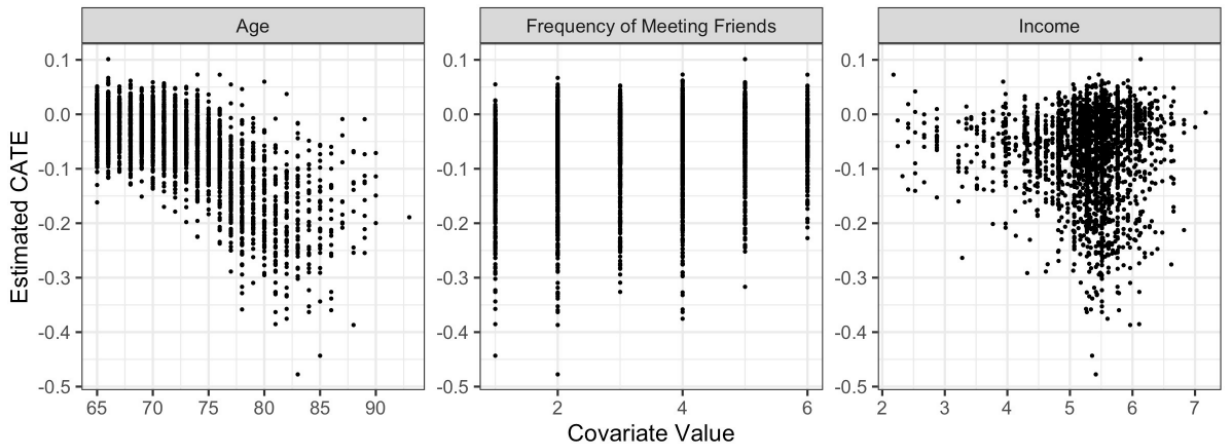

**Web Figure 6. Distribution of estimated conditional average treatment effects of home loss on functional limitation outcomes in 2016 by covariate values.**

The three covariates were chosen based on the variable importance ranking shown in Web Table 11. Heterogeneous effects (i.e., conditional average treatment effects: CATEs) were estimated using generalized random forest algorithm, using the 55 pre-disaster demographic and socioeconomic factors, health conditions, psychosocial variables, and behaviors from the 2010 wave. Decrease in the outcomes indicates increased functional limitation; hence, smaller CATEs indicates more adverse impacts of home loss.



A) Outcome: Levels of Certified Physical Disability in 2013

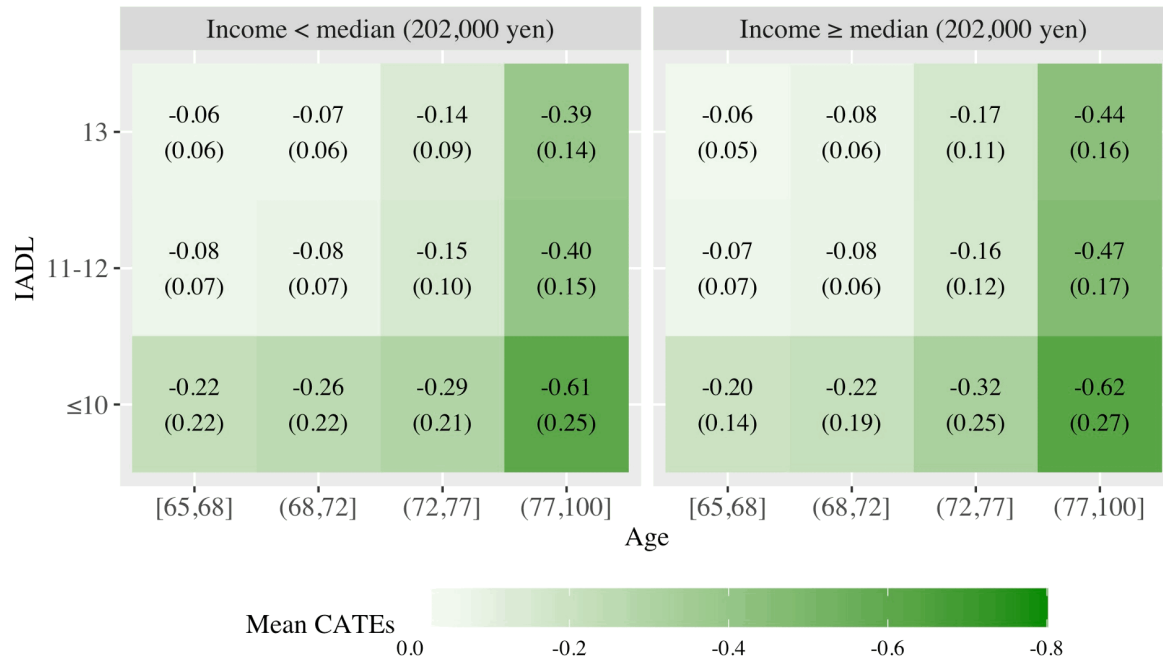

B) Outcome: Levels of Certified Physical Disability in 2016

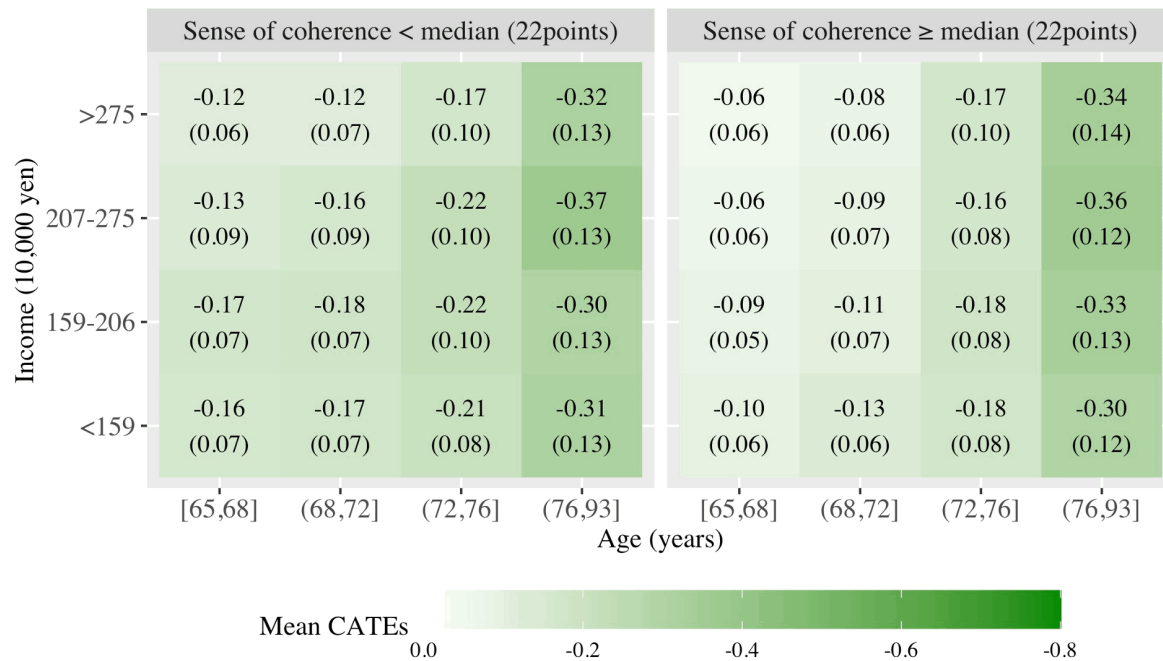

**Web Figure 7. Heatmap showing the distribution of estimated conditional average treatment effects of home loss on physical disability levels in 2013 and 2016.**

The three covariates were chosen based on the variable importance ranking shown in Web Table 11. Heterogeneous effects (i.e., conditional average treatment effects: CATEs) were estimated using generalized random forest algorithm, using the 55 pre-disaster demographic and socioeconomic factors, health conditions, psychosocial variables, and behaviors from the 2010 wave. Levels of certified physical disability ranged from 1 ("Cannot roll over in a bed independently") to 9 ("no physical disability/not requesting care services"), where smaller values indicate greater levels of disability. Thus, decrease in the outcome indicates increased functional limitation.

A) Outcome: Instrumental Activities of Daily Living in 2013

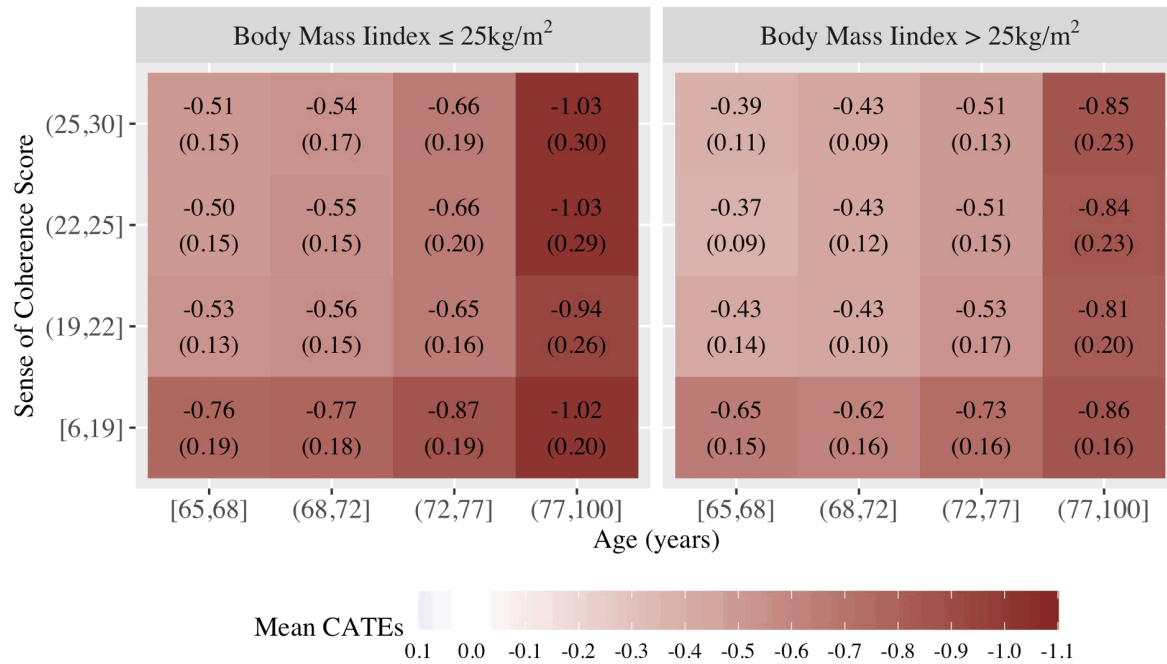

B) Outcome: Instrumental Activities of Daily Living in 2016

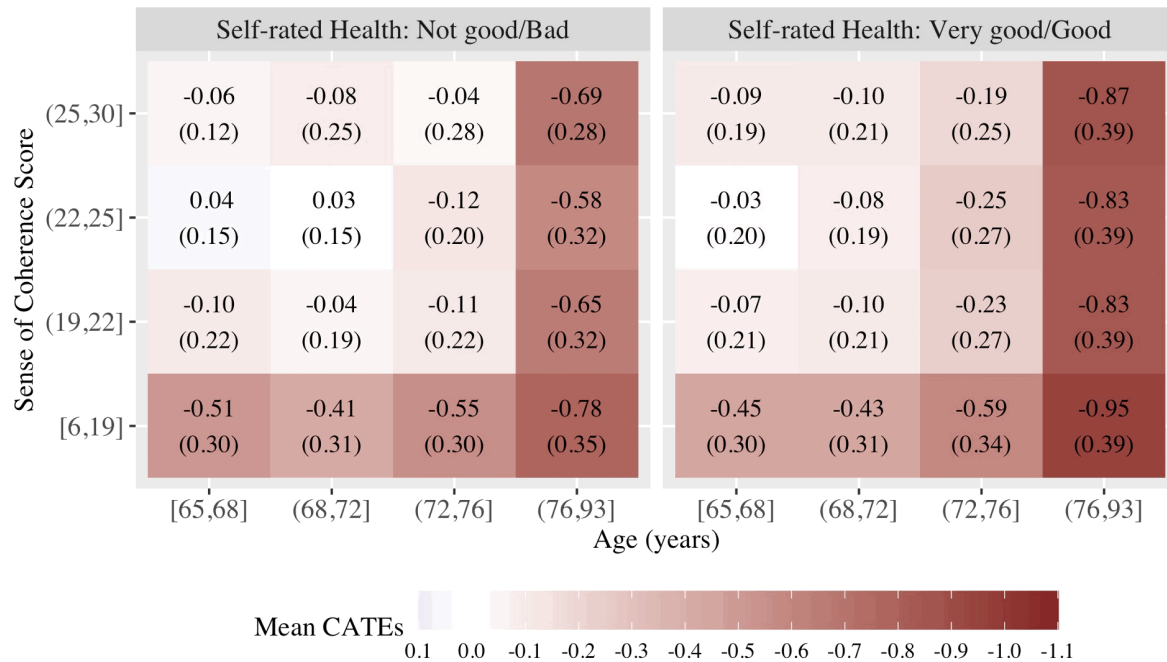

**Web Figure 8. Heatmap showing the distribution of estimated conditional average treatment effects of home loss on instrumental activities of daily living in 2013 and 2016.**

The three covariates were chosen based on the variable importance ranking shown in Web Table 11. Heterogeneous effects (i.e., conditional average treatment effects: CATEs) were estimated using generalized random forest algorithm, using the 55 pre-disaster demographic and socioeconomic factors, health conditions, psychosocial variables, and behaviors from the 2010 wave. IADL was measured by the 13-item Tokyo Metropolitan Institute of Gerontology Index of Competence. Scores ranged from 0-13 points for total IADL, where smaller scores indicate lower functional independence. Thus, decrease in the outcome indicates increased functional limitation.

A) Outcome: Activities of Daily Living in 2013

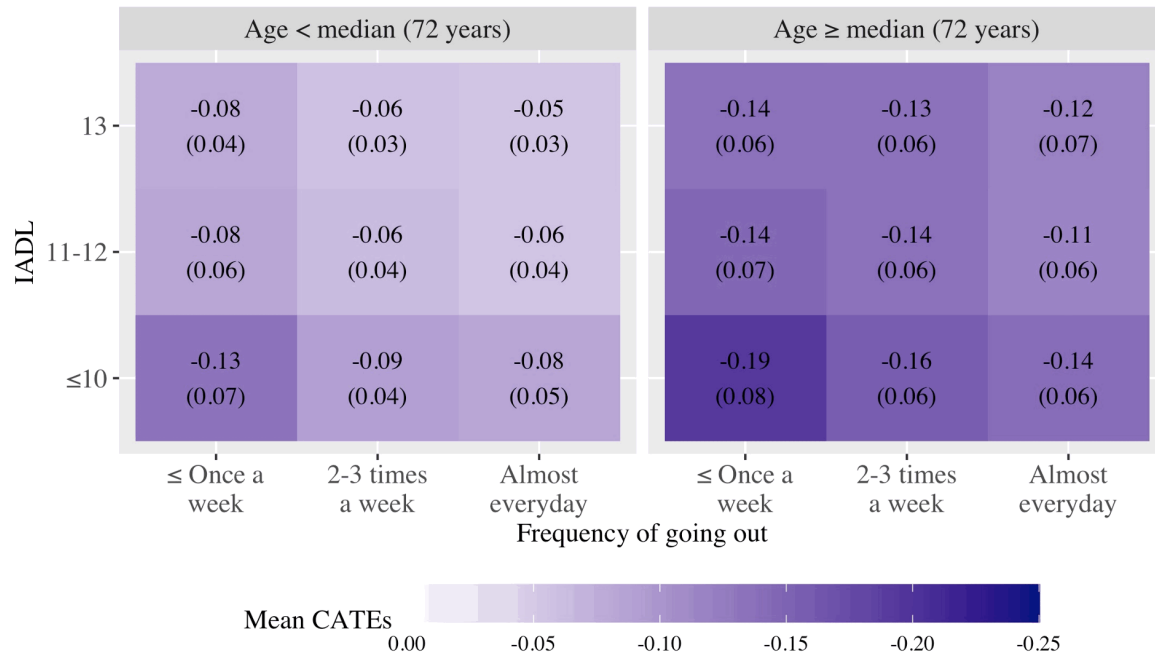

B) Outcome: Activities of Daily Living in 2016

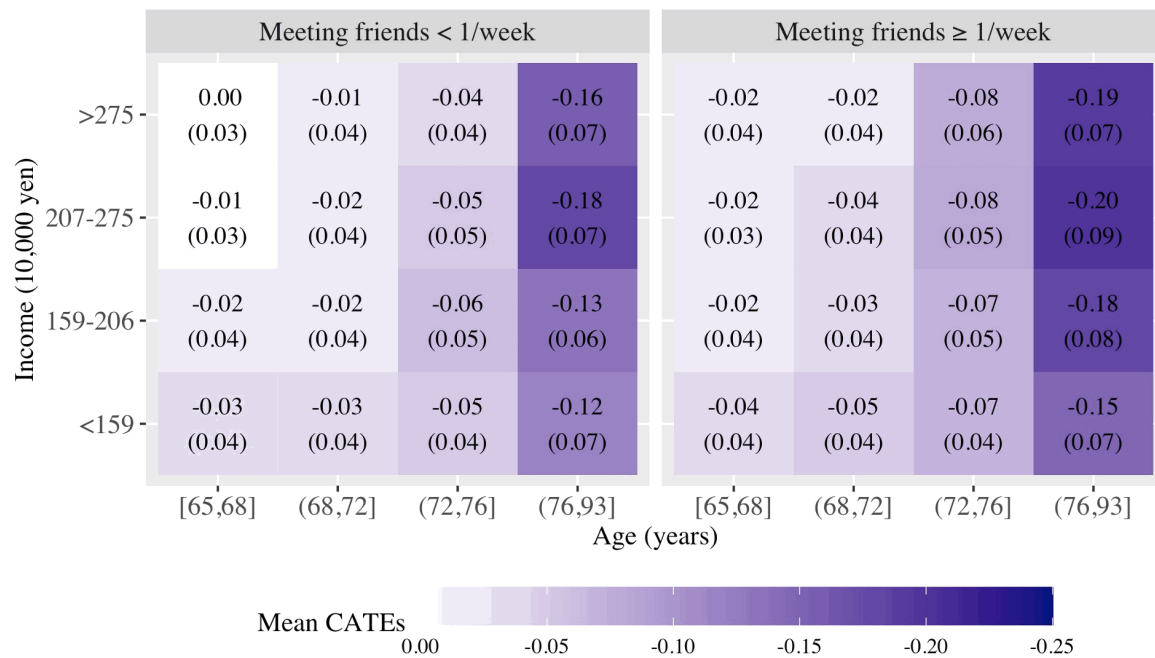

**Web Figure 9. Heatmap showing the distribution of estimated conditional average treatment effects of home loss on activities of daily living in 2013 and 2016.**

The three covariates were chosen based on the variable importance ranking shown in Web Table 11. Heterogeneous effects (i.e., conditional average treatment effects: CATEs) were estimated using generalized random forest algorithm, using the 55 pre-disaster demographic and socioeconomic factors, health conditions, psychosocial variables, and behaviors from the 2010 wave. ADL had three levels (1= support needed completely, 2 = support needed partially, and 3 = no help needed). Thus, decrease in the outcome indicates increased functional limitation.

**A**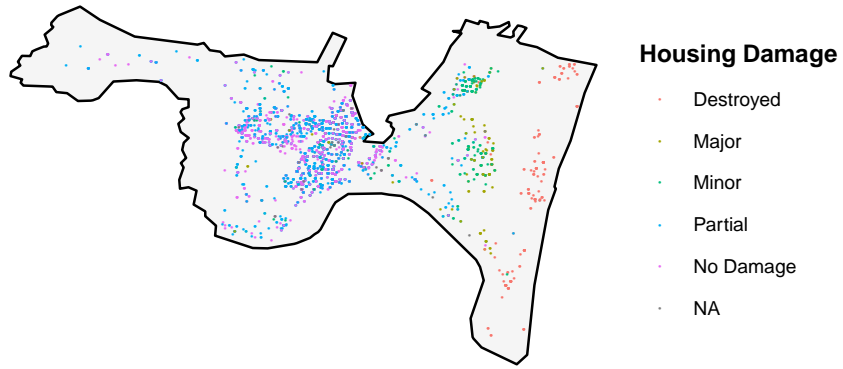**B**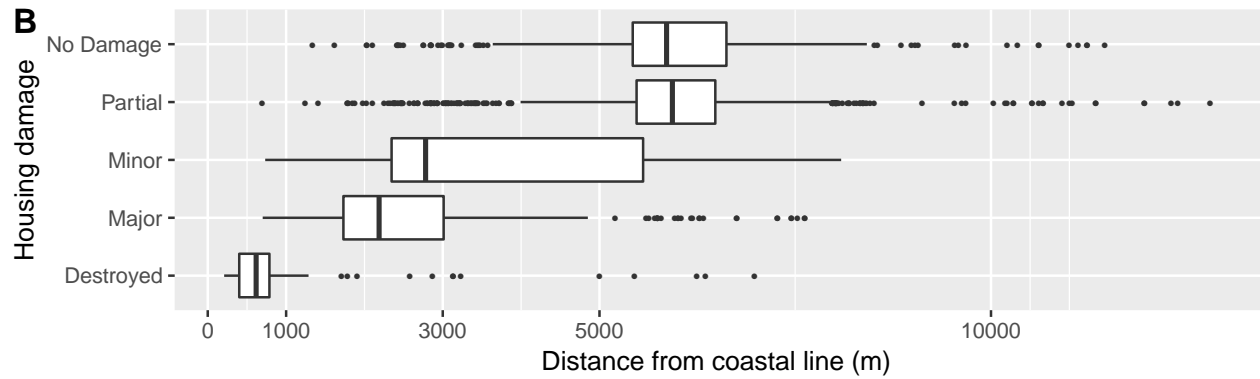

**Web Figure 10. Relationship between degree of property damage and distance from the coastal line. A) Geographic distribution of housing damage in 2013; B) Association between pre-earthquake distance from the coast and housing damage.**

## References

1. Stekhoven DJ, Stekhoven MDJ. Package 'missForest.' *cran.r-project.org › web › packages › missForestcran.r-project.org › web › packages › missForest*. 2012. <https://cran.r-project.org/web/packages/missForest/missForest.pdf>.
2. Breiman L. Random Forests. *Mach Learn*. 2001;45(1):5-32. doi:10.1023/A:1010933404324.
3. Shiba K, Kawahara T, Aida J, et al. Causal Inference in Studying the Long-term Health Effects of Disasters: Challenges and Potential Solutions. *Am J Epidemiol*. doi:10.1093/aje/kwab064.
